1           **Intraneuronal chloride accumulation via NKCC1 is not essential for**  
2           **hippocampal network development *in vivo***

3           Jürgen Graf <sup>1,9</sup>, Chuanqiang Zhang <sup>1,6,9</sup>, Stephan Lawrence Marguet <sup>2,3,9</sup>, Tanja Herrmann <sup>4,9</sup>,  
4           Tom Flossmann <sup>1,7</sup>, Robin Hinsch <sup>2,3</sup>, Vahid Rahmati <sup>5</sup>, Madlen Guenther <sup>1</sup>,  
5           Christiane Frahm <sup>1</sup>, Anja Urbach <sup>1</sup>, Ricardo Melo Neves <sup>2,3</sup>, Otto W. Witte <sup>1</sup>,  
6           Stefan J. Kiebel <sup>5</sup>, Dirk Isbrandt <sup>2,3</sup>, Christian A. Hübner <sup>4</sup>,  
7           Knut Holthoff <sup>1,10</sup> and Knut Kirmse <sup>1,8,10,\*</sup>

8           <sup>1</sup> Hans-Berger Department of Neurology, Jena University Hospital, 07747 Jena, Germany

9           <sup>2</sup> Institute for Molecular and Behavioral Neuroscience, University of Cologne, 50937  
10          Cologne, Germany

11          <sup>3</sup> German Center for Neurodegenerative Diseases (DZNE), 53127 Bonn, Germany

12          <sup>4</sup> Institute of Human Genetics, Jena University Hospital, 07747 Jena, Germany

13          <sup>5</sup> Department of Psychology, Technical University Dresden, 01187 Dresden, Germany

14          <sup>6</sup> Present address: Laboratory of Sensory Processing, Brain Mind Institute, Faculty of Life  
15          Sciences, École Polytechnique Fédérale de Lausanne (EPFL), CH-1015 Lausanne,  
16          Switzerland

17          <sup>7</sup> Present address: Centre for Discovery Brain Sciences, Biomedical Sciences, University of  
18          Edinburgh, Edinburgh, EH8 9XD, United Kingdom

19          <sup>8</sup> Institute of Physiology, Department of Neurophysiology, University of Würzburg, 97070  
20          Würzburg, Germany

21          <sup>9</sup> These authors contributed equally.

22          <sup>10</sup> Senior authors

23          \* Correspondence to:

24          Dr. Knut Kirmse

25          Hans-Berger Department of Neurology, Jena University Hospital, Am Klinikum 1, 07747  
26          Jena, Germany

27          Phone: +49 (0)3641 9 325 998

28          Fax: +49 (0)3641 9 325 902

29          E-mail: [knut.kirmse@med.uni-jena.de](mailto:knut.kirmse@med.uni-jena.de)

## Abstract

NKCC1 is the primary transporter mediating chloride uptake in immature principal neurons, but its role in the development of *in vivo* network dynamics and cognitive abilities remains unknown. Here, we address the function of NKCC1 in developing mice using electrophysiological, optical and behavioral approaches. We report that NKCC1 deletion from telencephalic glutamatergic neurons decreases *in-vitro* excitatory GABA actions and impairs neuronal synchrony in neonatal hippocampal brain slices. *In vivo*, it has a minor impact on correlated spontaneous activity in the hippocampus and does not affect network activity in the intact visual cortex. Moreover, long-term effects of the developmental NKCC1 deletion on synaptic maturation, network dynamics and behavioral performance are subtle. Our data reveal a neural network function of depolarizing GABA in the hippocampus *in vivo*, but challenge the hypothesis that NKCC1 is essential for major aspects of hippocampal development.

**Keywords:** GABA, NKCC1, hippocampus, development, *in vivo*

## Introduction

45  
46 Intracellular chloride concentration ( $[Cl^-]_i$ ) is a major determinant of neuronal excitability, as  
47 GABAergic inhibition is primarily mediated by chloride-permeable ionotropic receptors  
48 (Bormann et al., 1987). In the mature brain,  $[Cl^-]_i$  is maintained at low levels by secondary  
49 active chloride extrusion, which renders GABA hyperpolarizing (Rivera et al., 1999) and  
50 counteracts activity-dependent chloride loads (Doyon et al., 2016). Effective GABAergic  
51 inhibition in the adult brain is crucial not only for preventing runaway excitation of recurrently  
52 connected glutamatergic cells (Krnjevic et al., 1963) but also for entraining neuronal  
53 assemblies into oscillatory rhythms underlying cognitive processing (Allen et al., 2015).  
54 However, it has long been known that the capacity of chloride extrusion is low during early  
55 brain development (Luhmann et al., 1991; Spoljaric et al., 2017). In addition, immature  
56 neurons are equipped with chloride uptake mechanisms, in particular with the electroneutral  
57  $Na^+/K^+/2Cl^-$  cotransporter NKCC1 (Dzhala et al., 2005; Pfeffer et al., 2009; Sipilä et al., 2009;  
58 Wang et al., 2008; Yamada et al., 2004). NKCC1 contributes to the maintenance of high  $[Cl^-]_i$   
59 in the intact developing brain (Sulis Sato et al., 2017), thus favoring depolarizing responses to  
60 GABA<sub>A</sub> receptor (GABA<sub>A</sub>R) activation *in vivo* (Kirmse et al., 2015; van Rheede et al., 2015).  
61 When GABA acts as a mainly depolarizing neurotransmitter, neural circuits generate burst-  
62 like spontaneous activity (Ackman et al., 2012; Arichi et al., 2017; Khazipov et al., 2004;  
63 Kummer et al., 2016; Leinekugel et al., 2002), which is thought to be crucial for their  
64 developmental refinement (Blanquie et al., 2017; Oh et al., 2016; Winnubst et al., 2015;  
65 Zhang et al., 2011). A large body of evidence from acute brain slices indicates that cortical  
66 GABAergic interneurons promote neuronal synchrony in an NKCC1-dependent manner  
67 (Dzhala et al., 2005; Flossmann et al., 2019; Pfeffer et al., 2009; Rheims et al., 2008; Valeeva  
68 et al., 2016; Wester et al., 2016). However, the *in vivo* developmental functions of NKCC1 are

69 far from understood (Han et al., 2015; Kirmse et al., 2018). One fundamental question in this  
70 context is to what extent NKCC1-dependent GABAergic depolarization instructs the  
71 generation of correlated spontaneous activity in the intact developing brain. In the rodent  
72 neocortex *in vivo*, GABAergic transmission imposes spatiotemporal inhibition on spontaneous  
73 and sensory-evoked activity already in the neonatal period (Che et al., 2018; Colonnese et al.,  
74 2010; Kirmse et al., 2015; Valeeva et al., 2016). Whether a similar situation applies to other  
75 brain regions is unknown, as two recent studies employing chemo- and optogenetic  
76 techniques for manipulating GABA release from hippocampal interneurons yielded opposing  
77 results (Murata et al., 2020; Valeeva et al., 2016). Experimental manipulations of the chloride  
78 driving force are potentially suited to resolve these divergent findings, but available  
79 pharmacological (Löscher et al., 2013; Marguet et al., 2015; Sipilä et al., 2006) or  
80 conventional knockout (Delpire et al., 1999; Pfeiffer et al., 2009; Sipilä et al., 2009) strategies  
81 suffer from unspecific effects that complicate interpretations.

82 Here, we overcome this limitation by selectively deleting *Slc12a2* (encoding NKCC1) from  
83 telencephalic glutamatergic neurons. Using optical and electrophysiological recordings, we  
84 show that chloride uptake via NKCC1 strongly promotes synchronized network activity in  
85 acute hippocampal slices *in vitro*, but has weak and event type-dependent effects on  
86 spontaneous network activity in the neonatal CA1 *in vivo*. The long-term loss of the  
87 cotransporter leads to subtle changes of network dynamics in the adult hippocampus, leaving  
88 synaptic development unperturbed and hippocampus-dependent behavioral performance  
89 intact. Our data suggest that NKCC1-dependent chloride uptake is largely dispensable for  
90 several key aspects of hippocampal development *in vivo*.

## Results

### *Behavioral performance of mice in the conditional absence of NKCC1 from telencephalic glutamatergic cells*

To investigate the role of depolarizing GABAergic transmission in telencephalic glutamatergic neurons, we conditionally deleted *Slc12a2* in *Emx1*-lineage cells of embryonic mice using a transgenic Cre-loxP-based approach (Figure 1A). A comparison to *NKCC1<sup>flox/flox</sup>* (WT) littermates showed that Cre-dependent recombination had been widespread in the hippocampus (Figure 1B) and led to a profound reduction in total hippocampal *Slc12a2* mRNA levels in *Emx1<sup>IREScree</sup>:NKCC1<sup>flox/flox</sup>* ( $\text{KO}^{\text{Emx1}}$ ) mice as early as at postnatal days (P) 2–3 (Figure 1C and Table S1). Fate mapping of *Emx1*-lineage cells in hippocampal areas CA3 and CA1 at P54–63 confirmed that Cre expression was restricted to glutamatergic neurons ( $\text{GAD67}^-/\text{NeuN}^+$ ), whereas cells expressing either a pan-GABAergic ( $\text{GAD67}$ ) or a subtype-selective GABAergic interneuron (parvalbumin or somatostatin) marker were Cre-reporter negative (Figure S1A–J). WT and  $\text{KO}^{\text{Emx1}}$  mice were born at Mendelian ratios ( $P = 0.41$ ,  $\chi^2 = 0.69$ ,  $n = 71$  mice, chi-squared-test), displayed a normal postnatal gain in body weight (Figure S1K), similar brain growth (measured by lambda-bregma distance, see #14 in Table S1), and showed unperturbed developmental reflexes, including cliff avoidance behavior and righting reflex (Figures S1L and S1M). Next, we subjected adult mice to a battery of behavioral tests to assess whether the conditional loss of NKCC1 would result in an overt phenotype. Unlike conventional NKCC1 knockout mice (Antoine et al., 2013),  $\text{KO}^{\text{Emx1}}$  mice exhibited unaltered locomotor activity and exploratory behavior as assessed in the open field (Figures 1D and 1E). Spontaneous alternations in a Y-maze, which served as a measure of spatial working memory, were unaffected (Figures 1F and 1G). Spatial learning and memory as evaluated in a Morris water maze (Figures 1H–1K), as well as cue- and context-specific fear memory

115 (Figures 1L–1N), were not significantly altered by the chronic loss of NKCC1, either. In sum,  
116  $KO^{Emx1}$  mice lack the severe phenotype of NKCC1 null mice, which is due to NKCC1 loss  
117 from tissues other than the brain (Delpire et al., 1999). In addition, the phenotype resulting  
118 from the conditional deletion of NKCC1 from telencephalic principal neurons is compatible  
119 with a normal development of several hippocampus-dependent and -independent behaviors.

120

### 121 *Loss of NKCC1 attenuates the depolarizing action of GABA*

122 We next investigated how the loss of NKCC1 alters the cellular actions of GABA in the  
123 neonatal hippocampus. To this end, we first used low-gramicidin perforated-patch current-  
124 clamp recordings that allow monitoring the membrane potential ( $V_m$ ), while minimizing the risk  
125 of unintended membrane breakthrough (Zhang et al., 2019; Zhu et al., 2008). Measurements  
126 were performed in acute slices (P3–4) in the presence of antagonists of ionotropic glutamate  
127 receptors (10  $\mu$ M DNQX, 50  $\mu$ M APV) and voltage-gated  $Na^+$  (0.5  $\mu$ M TTX) and  $Ca^{2+}$  (100  $\mu$ M  
128  $CdCl_2$ ) channels so as to block recurrent excitation and amplification of voltage changes by  
129 intrinsic conductances. Resting membrane potential of CA3 pyramidal cells (PCs) was similar  
130 in WT and  $KO^{Emx1}$  mice (Figures 2A and 2B, Table S2). However, NKCC1 deletion resulted in  
131 a significantly reduced peak membrane potential ( $V_{peak}$ ) induced by a saturating puff of the  
132  $GABA_A$  receptor ( $GABA_A R$ ) agonist isoguvacine (100  $\mu$ M, 2 s) by almost 10 mV (WT:  $-50.9 \pm$   
133  $1.9$  mV,  $n = 15$ ,  $KO^{Emx1}$ :  $-58.6 \pm 2.8$  mV,  $n = 10$ ,  $P = 0.028$ , two-sample t-test; Figure 2B).  
134 Because  $V_{peak}$  will approximate the reversal potential of  $GABA_A R$ -mediated currents ( $E_{GABA}$ )  
135 under these conditions, our data imply lower  $[Cl^-]_i$  in cells obtained from NKCC1  $KO^{Emx1}$  mice.  
136 Isoguvacine-induced  $V_m$  changes in individual cells were consistent across successive trials  
137 (Figure 2C). In line with this observation, amplitudes of somatic  $Ca^{2+}$  transients (CaTs)  
138 evoked by bath application of GABA (100  $\mu$ M, 1 min) in the continuous presence of TTX were

139 attenuated in putative PCs of KO<sup>Emx1</sup> mice (P2–4), whereas glutamate-induced CaTs were  
140 unaffected (Figure S2). Furthermore, cell-attached voltage-clamp recordings in the presence  
141 of ionotropic glutamate receptor blockers (10  $\mu$ M DNQX, 50  $\mu$ M APV) revealed that puff  
142 application of isoguvacine (100  $\mu$ M, 100 ms) transiently increased action potential (AP)  
143 frequency in WT cells, but this effect was largely absent from PCs of KO<sup>Emx1</sup> mice at P3–4  
144 (Figures 2D–2F). We conclude that NKCC1 deletion attenuates GABA<sub>A</sub>R-mediated  
145 depolarization and virtually abolishes excitatory effects of GABAergic transmission *in vitro*.

146

#### 147 *PC-specific NKCC1 deletion impairs spontaneous hippocampal network activity in vitro*

148 Based on previous experimental and theoretical results (Flossmann et al., 2019; Pfeffer et al.,  
149 2009; Sipilä et al., 2006), we hypothesized that a PC-specific attenuation of GABAergic  
150 depolarization would impair synchronized network activity. We tested this prediction in the  
151 CA3 area of acute hippocampal slices (P1–4) using whole-cell voltage-clamp recordings of  
152 spontaneous GABAergic postsynaptic currents (sGPSCs) isolated by their reversal potential  
153 (Figure 3A). We found that sGPSC frequencies did not significantly differ between genotypes  
154 (Figure 3B and Table S3). In WT slices, sGPSCs typically occurred in distinct bursts [also  
155 known as giant depolarizing potentials (GDPs) (Ben-Ari et al., 1989)] (Figure 3A). However,  
156 this temporal structure was largely absent in cells recorded from KO<sup>Emx1</sup> mice (Figure 3A). To  
157 quantify this effect, a frequency-dependent metric referred to as burst index (see Methods)  
158 was computed for measured data and compared to a Poisson point process in which sGPSCs  
159 occur randomly. Irrespective of the average sGPSC frequency, burst indices of WT, but not of  
160 KO<sup>Emx1</sup>, cells were consistently higher than those expected for a random (Poisson) case  
161 (Figure 3C). When controlling for the effect of sGPSC frequency, we found that burst indices  
162 were significantly reduced by the conditional loss of NKCC1 (main effect genotype:  $P < 1.2 \times$

163  $10^{-4}$ ,  $F = 26.3$ ,  $\eta_p^2 = 0.64$ ,  $df = 1$ , analysis of covariance; Figure 3D), suggesting that neuronal  
164 synchrony was profoundly impaired in  $KO^{Emx1}$  mice. This conclusion was confirmed by single-  
165 cell confocal  $Ca^{2+}$  imaging using the synthetic indicator OGB1, which revealed a dramatic  
166 reduction in GDP frequency in CA3 of  $KO^{Emx1}$  mice at P1–4 (Figure S3). Of note, the effects  
167 of a conditional loss of NKCC1 were region-dependent because the kinetics of single-cell  
168 recruitment in CA1 during GDPs was significantly slowed down in slices from  $KO^{Emx1}$  mice,  
169 while the GDP frequency was similar in both genotypes (Figure S3).

170 We next sought to extend these findings by performing independent large-scale confocal  $Ca^{2+}$   
171 imaging experiments using a conditional transgenic expression of the genetically encoded  
172 indicator GCaMP3 in *Emx1*-lineage cells. At P1–4, large-amplitude network events were  
173 detected in slices obtained from WT ( $Emx1^{IREScre}:NKCC1^{wt/wt}:GCaMP3^{LSL}$ ) mice, which often  
174 occurred almost simultaneously in multiple hippocampal subfields and frequently involved  
175 both hippocampal and adjacent cortical areas (Figure 3E). While such activity was also  
176 present in slices from  $KO^{Emx1}$  ( $Emx1^{IREScre}:NKCC1^{flox/flox}:GCaMP3^{LSL}$ ) mice, the area under the  
177 curve of detected network events was substantially reduced in both the hippocampus and  
178 adjacent cortical regions (Figures 3E–3G). In addition, a reduction in the average active time  
179 was found in CA3 (Figure 3F). Collectively, several lines of evidence show that PC-specific  
180 NKCC1 deletion leads to a profound attenuation of neuronal synchrony *in vitro*.

181

182 *NKCC1 effects on hippocampal network dynamics are not accounted for by alterations in*  
183 *intrinsic excitability or basic synaptic properties*

184 The question how GABAergic transmission instructs proper neuronal development remains  
185 largely unanswered (Kirmse et al., 2018). Some previous data indicate that the absence of  
186 NKCC1 could interfere with the normal maturation of synaptic (Wang et al., 2008) and/or



187 intrinsic (Sipilä et al., 2009) conductances. We therefore set out to examine whether altered  
188 network dynamics observed in NKCC1 KO<sup>Emx1</sup> mice result from an acute shift in  $E_{GABA}$  as  
189 reported above or, alternatively, from developmental changes following NKCC1 disruption in  
190 embryonic life. As an overall measure of intrinsic excitability, we first assessed spontaneous  
191 AP firing in the presence of ionotropic glutamate and GABA receptor antagonists (10  $\mu$ M  
192 DNQX, 50  $\mu$ M APV, 10  $\mu$ M bicuculline methiodide [BMI]) by means of cell-attached voltage-  
193 clamp recordings from CA3 PCs at P3–4. In contrast to results obtained from an NKCC1 null  
194 line (Sipilä et al., 2009), AP frequencies were unaffected by the conditional loss of NKCC1  
195 (WT:  $0.31 \pm 0.09$  Hz,  $n = 8$ , KO<sup>Emx1</sup>:  $0.29 \pm 0.11$  Hz,  $n = 11$ ,  $P = 0.39$ , exact Mann-Whitney U-  
196 test; Figures 4A and 4B, Table S4). Moreover, NKCC1 disruption did not significantly alter  
197 neuronal input-output relationships as revealed by whole-cell recordings of AP firing in  
198 response to somatic current injections of variable amplitudes (Figures 4C and 4D). In  
199 agreement with this finding, neither passive membrane properties (see #10–12 in Table S4)  
200 nor AP threshold (Figure 4E) of CA3 PCs were modified by the loss of NKCC1.

201 We next investigated whether the basic properties of glutamatergic and/or GABAergic  
202 synapses were altered upon PC-specific NKCC1 disruption. Whole-cell voltage-clamp  
203 recordings from CA3 PCs were performed at P3–4 and P14–16, because this time period is  
204 characterized by intense synaptogenesis and subunit reorganization of postsynaptic  
205 receptors. AMPA receptor-dependent miniature PSCs (mEPSCs) displayed a profound  
206 developmental increase in frequency, accompanied by a moderate increase in (quantal)  
207 amplitude and a deceleration in decay kinetics (Figure 4G) – in line with published data  
208 (Stubblefield et al., 2010). Of note, these maturational alterations were independent of the  
209 genotype, since no significant interaction (age  $\times$  genotype) was found for any of the  
210 parameters examined (at least  $P > 0.6$ , two-way ANOVAs, Table S4). GABA<sub>A</sub>R-mediated

211 miniature postsynaptic currents (mGPSCs) also underwent a substantial developmental  
212 increase in frequency (Figures 4H and 4I, left), along with an acceleration in their decay  
213 kinetics (Figure 4I, right) (Cohen et al., 2000), but no change in quantal amplitude (Figure 4I,  
214 middle). These developmental trajectories were indistinguishable between WT and KO<sup>Emx1</sup>  
215 mice (two-way ANOVAs, Table S4). In summary, both intrinsic excitability and basic synaptic  
216 properties were unaffected by the conditional disruption of NKCC1 and, thus, are unlikely to  
217 account for the alteration of *in vitro* hippocampal network dynamics observed in NKCC1  
218 KO<sup>Emx1</sup> mice.

219

#### 220 *Hippocampal sharp waves in vivo persist in the conditional absence of NKCC1*

221 Next, we investigated the effect of the loss of NKCC1 in principal neurons on *in vivo*, awake  
222 hippocampal network and CA1 multi-unit activity (MUA) at P4. We recorded local field  
223 potentials (LFPs) along the CA1-dentate gyrus axis using linear 32-site silicon probes in  
224 awake head-fixed neonates. We observed similar activity patterns in P4 hippocampus of both  
225 WT and NKCC1 KO<sup>Emx1</sup> mice: sharp waves (SPWs) with a phase reversal in the CA1  
226 pyramidal layer and short-lasting oscillations in the 10–30 Hz (beta) frequency range  
227 (hippocampal network oscillations, HNOs; Figures 5A and 5B) as previously described (Fazeli  
228 et al., 2017; Marguet et al., 2015). Depth profiles of SPWs were comparable to those  
229 described in rat pups (Valeeva et al., 2019) ('rad/lm SPW' in Figure 5C). In addition, we found  
230 inverted SPWs with their maximum negativity and a corresponding current sink in *stratum*  
231 *oriens* (s.o., 'oriens SPW' in Figure 5C). Both SPW types elicited distinct MUA patterns in the  
232 CA1 pyramidal layer that were similar for both genotypes. None of these SPW events'  
233 properties such as occurrence frequency and amplitudes or event durations differed between  
234 WT and KO<sup>Emx1</sup> animals (Figure 5D and Table S5). Likewise, SPW properties did not differ

235 between genotypes in P7 or P12 neonates (Figure S4). Furthermore, neither the rate nor the  
236 length of HNOs differed significantly between the genotypes at P4 (Figure 5D).

237

238 *NKCC1 promotes correlated network activity in an event type- and region-specific manner in*  
239 *vivo*

240 As LFPs mainly result from postsynaptic current flow (i.e., neuronal input), we further  
241 characterized *in vivo* network dynamics using wide-field epifluorescence Ca<sup>2+</sup> imaging, which  
242 primarily reflects AP firing (i.e., neuronal output). To gain optical access to CA1 *in vivo*, a  
243 hippocampal window preparation (Mizrahi et al., 2004) was adapted for use in neonatal mice  
244 (P3–4; Figure 6A). Control experiments based on LFP recordings, using a tungsten electrode  
245 positioned in *stratum radiatum* (s.r.), confirmed that SPW frequencies measured either  
246 through the intact cortex or after focal cortex aspiration did not significantly differ from each  
247 other (P = 0.91, exact Mann-Whitney U-test; Figures S5A–S5C and Table S6). Ca<sup>2+</sup> imaging  
248 was then performed in mice conditionally expressing GCaMP3 in *Emx1*-lineage cells (Figure  
249 6B). Under N<sub>2</sub>O anesthesia, spontaneous network activity occurred in the form of  
250 spatiotemporal clusters of CaTs, frequently recruiting large parts of the field of view (~0.6  
251 mm<sup>2</sup>), in all WT and KO<sup>Emx1</sup> animals examined (n = 22; Figures 6B–6E). Simultaneous LFP  
252 recordings revealed that approximately two-thirds of Ca<sup>2+</sup> clusters were temporally unrelated  
253 to SPWs (–SPW; Figures 6C–6E and 6G; see Methods) in both genotypes. –SPW Ca<sup>2+</sup>  
254 clusters lacked a consistent electrophysiological signature (Figures 6C and 6D), suggesting  
255 that LFP measurements are biased towards SPW-related (+SPW) network events in CA1.  
256 Importantly, both +SPW and –SPW Ca<sup>2+</sup> clusters were entirely AP-dependent (Figures S5D  
257 and S5E).

258 For quantification, the field of view was subdivided into a regular grid of regions of interest

259 (ROIs; Figure 6B). We found that the mean frequency of spontaneous CaTs per ROI was  
260 significantly lower in KO<sup>Emx1</sup> mice than that in WT littermates (WT:  $5.8 \pm 0.3 \text{ min}^{-1}$ ,  $n = 12$ ,  
261 KO<sup>Emx1</sup>:  $4.6 \pm 0.4 \text{ min}^{-1}$ ,  $n = 10$ ,  $P = 0.015$ , two-sample t-test; Figure 6F and Table S6).  
262 Likewise, total Ca<sup>2+</sup> cluster frequency was reduced from  $7.9 \pm 0.4$  in WT to  $6.3 \pm 0.4$  in KO<sup>Emx1</sup>  
263 mice (main effect genotype:  $P = 8.8 \times 10^{-3}$ , two-way ANOVA; Table S6). Thus, our data  
264 identify an excitatory network effect of NKCC1 expressed by PCs in the neonatal CA1. While  
265 there was no significant interaction between the independent variables (genotype  $\times$  SPW), we  
266 found a significant reduction in the frequency of  $-SPW$  ( $P = 0.010$ ), but not in  $+SPW$  events  
267 ( $P = 0.72$ , two-sample t-tests with Bonferroni correction; Figure 6G). As compared to  $+SPW$   
268 Ca<sup>2+</sup> clusters,  $-SPW$  events had slower rise kinetics (Figure 6H), smaller cluster areas (Figure  
269 6I) and lower CaT amplitudes (Figure 6J), indicating that they represent a separate class of  
270 CA1 network events. Interestingly, no genotype-dependent difference was found in any of  
271 these parameters (interaction genotype  $\times$  SPW: at least  $P > 0.5$ , two-way ANOVAs; Figures  
272 6H–6J and Table S6), demonstrating that network dynamics in the conditional absence of  
273 NKCC1 qualitatively resembled those observed in WT mice.

274 Ample theoretical and *in vitro* evidence indicates that depolarizing GABAergic transmission  
275 can mediate both excitation and inhibition in a context-dependent manner (Jean-Xavier et al.,  
276 2007; Kolbaev et al., 2011; Morita et al., 2006). We therefore examined the net contribution of  
277 endogenously released GABA by locally blocking GABA<sub>A</sub>Rs and found that superfusion of the  
278 hippocampal window with gabazine (40  $\mu\text{M}$ ) differentially influenced  $+SPW$  and  $-SPW$  Ca<sup>2+</sup>  
279 clusters at P3–4. The frequency of  $+SPW$  Ca<sup>2+</sup> clusters was massively augmented, while that  
280 of  $-SPW$  Ca<sup>2+</sup> clusters was significantly decreased (Figures 6K and 6L). In addition,  
281 amplitudes of both event classes increased following GABA<sub>A</sub>R block, but this effect was  
282 significantly stronger for  $+SPW$  Ca<sup>2+</sup> clusters (for statistical details, see #7 in Table S6).

283 Collectively, our data support the notion that GABAergic transmission facilitates the  
284 generation of –SPW  $\text{Ca}^{2+}$  clusters and additionally imposes inhibitory constraints, especially  
285 on +SPW events.

286 In contrast to our results obtained for the hippocampus, previous studies employing  
287 electrophysiological (Marguet et al., 2015; Minlebaev et al., 2007) or optical (Kirmse et al.,  
288 2015) measurements did not reveal a contribution of NKCC1 to spontaneous network activity  
289 in the neonatal neocortex. As this observation might imply brain region-dependent differences  
290 in the role of NKCC1 and, thus, depolarizing GABA (Murata et al., 2020), we next examined  
291 the consequences of a PC-specific NKCC1 disruption in the neonatal visual cortex (P3–4).  
292 Cell-attached recordings in acute slices confirmed that puff application of a GABA<sub>A</sub>R agonist  
293 induced AP firing in PCs from WT, but not in PCs from  $\text{KO}^{\text{Emx1}}$  mice, demonstrating a loss of  
294 GABA-mediated excitation in the conditional absence of NKCC1 (Figures S6A–S6C).  
295 Moreover, total *Slc12a2* mRNA levels in the visual cortex of neonatal NKCC1  $\text{KO}^{\text{Emx1}}$  mice  
296 were strongly reduced as compared to WT littermates (Figure S6D). Using *in vivo* wide-field  
297  $\text{Ca}^{2+}$  imaging, we found that major aspects of spontaneous network activity were unaffected  
298 by NKCC1 loss, both at P3–4 (Figures 6M–6P) and P9–10 (Figures S6E–6H). Spindle bursts  
299 represent the main electrophysiological signature of  $\text{Ca}^{2+}$  clusters in the neonatal visual  
300 cortex (Kirmse et al., 2015). In agreement with data from optical measurements, multi-site  
301 LFP recordings from awake head-fixed P4 and P7 neonates confirmed that spindle burst  
302 properties including occurrence rates, lengths, and power spectral densities were unaltered in  
303  $\text{KO}^{\text{Emx1}}$  mice (Figures S6I–6K).

304 Collectively, our data indicate that PC-specific expression of NKCC1 facilitates the generation  
305 of correlated network activity in a brain region- and event type-specific manner.

306

307 *Long-term alterations of in vivo hippocampal network dynamics upon NKCC1 deletion in*  
308 *Emx1-lineage cells*

309 As correlated spontaneous activity is thought to be required for the proper maturation of  
310 neuronal circuits (Kirischuk et al., 2017; Leighton et al., 2016), we next investigated the long-  
311 term developmental effects of a PC-specific NKCC1 deletion onto *in vivo* hippocampal  
312 network dynamics in urethane-anesthetized 13-14 weeks-old mice. We recorded depth  
313 profiles of spontaneous LFPs along the CA1-dentate gyrus axis. Hippocampal LFPs from both  
314 WT and NKCC1 KO<sup>Emx1</sup> mice showed paradoxical (REM) sleep-like activity, i.e., theta/gamma  
315 oscillations and non-REM slow wave sleep (SWS)-like LFP epochs with the characteristic  
316 SPW-ripple (SPW-R) complexes in CA1. These activity patterns alternated spontaneously  
317 throughout the recording session (Figure 7A). Quantitative LFP analysis of theta power depth  
318 profiles during REM-like epochs with similar theta phase depth profiles (see Methods and  
319 Figures S7A and S7B) revealed increased theta amplitudes in the hippocampal layers  
320 receiving direct input from entorhinal cortex [*stratum lacunosum moleculare* (s.l.m) and  
321 *stratum moleculare* (s.m.)], whereas amplitudes of low-gamma and multiunit activity  
322 frequency bands showed no significant changes in KO<sup>Emx1</sup> mice (Figures 7B and 7C).  
323 Analysis of SPW-Rs during SWS-like LFP epochs revealed lower ripple spectral frequencies,  
324 unchanged SPW amplitudes and decreased occurrence rates (Figure 7D). Cross-frequency  
325 coupling between theta and gamma oscillations, i.e., the modulation of gamma amplitudes by  
326 theta phase, was unaltered in KO<sup>Emx1</sup> mice (Figures S7C and S7D). In addition, peak spectral  
327 frequencies in the theta (3–7 Hz) or gamma (30–100 Hz) range were similar in both  
328 genotypes (Figure S7E). Together, our data indicate that NKCC1 deletion from forebrain PCs  
329 altered the properties of theta oscillations in hippocampal layers receiving entorhinal input as  
330 well as intrahippocampal dynamics during ripple oscillations.

331 We further analyzed network dynamics at single-cell resolution using two-photon  $\text{Ca}^{2+}$   
332 imaging in *stratum pyramidale* (s.p.) of mice (P45–50) under isoflurane anesthesia (Figure  
333 7E). In line with published data (Busche et al., 2012), distributions of single-cell CaT  
334 frequencies were broad and strongly skewed to the right in either genotype (Figures 7F and  
335 7G). Moreover, mean CaT frequencies per animal did not differ significantly between WT and  
336  $\text{KO}^{\text{Emx1}}$  mice (Figure 7H). We further computed pairwise Pearson correlations based on binary  
337 CaT time courses convolved with a Gaussian kernel. We found that, by the age investigated,  
338 CA1 network activity had undergone a developmental transition to a largely desynchronized  
339 state in both genotypes (Rocheffort et al., 2009). In quantitative terms, however, pairwise  
340 Pearson correlations were significantly lower in  $\text{KO}^{\text{Emx1}}$  mice as compared to their WT  
341 littermates (Figures 7I and 7J). Likewise, the spike-time tiling coefficient, a computationally  
342 independent affinity metric (Cutts et al., 2014), was significantly lower in the conditional  
343 absence of NKCC1 (Figure 7K). These genotype-dependent differences were abolished by  
344 randomly shuffling CaT times, confirming that they had not arisen from an inequality of CaT  
345 frequencies in individual cells.

346 Collectively, our data demonstrate subtle long-term alterations in both intrahippocampal  
347 dynamics and entorhinal cortex-hippocampus communication due to PC-specific NKCC1  
348 deletion.

349

## Discussion

350

### *Region- and event type-dependent contribution of NKCC1 to network dynamics in vivo*

351

Recent studies revealed that NKCC1 mediates net chloride accumulation in immature

352

neurons *in vivo*, giving rise to a mainly depolarizing action of GABA in the intact developing

353

brain (Kirmse et al., 2015; Sulis Sato et al., 2017; van Rheede et al., 2015). However, the *in*

354

*vivo* network functions of NKCC1-dependent GABAergic depolarization remained largely

355

elusive (reviewed in Kirmse et al., 2018). In particular, systemic pharmacological approaches

356

targeting NKCC1 yielded equivocal results (Marguet et al., 2015; Sipilä et al., 2006). By

357

conditionally deleting *Slc12a2* from the vast majority of telencephalic glutamatergic cells, we

358

demonstrate that NKCC1 facilitates synchronized network activity in the neonatal CA1 *in vivo*.

359

Specifically, NKCC1 deletion led to a selective reduction in the frequency of –SPW  $\text{Ca}^{2+}$

360

clusters (by on average ~20%), while leaving their kinetics, active area and amplitude

361

unaffected. In contrast, SPWs and +SPW  $\text{Ca}^{2+}$  clusters were unaffected (Figures 5 and 6).

362

Developmental compensations cannot be excluded from our data, but we emphasize that

363

NKCC1 loss did reduce  $[\text{Cl}^-]_i$  and profoundly attenuated network synchrony in acute slices.

364

Additionally, no compensatory alterations in intrinsic or synaptic properties were detected that

365

could explain the observed minor effect on network dynamics *in vivo*. Moreover, the impact of

366

NKCC1 is region-specific, as its deletion failed to affect spindle bursts in the visual cortex,

367

indicating that depolarizing GABAergic transmission is less important for driving network

368

activity in neocortex. Conceptually, this conclusion is supported by a recent chemogenetic

369

study, which revealed that the net action of GABA release is excitatory in CA1, but inhibitory

370

in V1 (Murata et al., 2020). While the cellular and/or network mechanisms underlying the

371

observed region specificity are currently unknown, it is worth noting that NKCC1 did

372

contribute to the maintenance of excitatory GABA actions (i.e.,  $[\text{Cl}^-]_i$ ) in both CA1 (Figure 2)



373 and the visual neocortex (Figure S6) *in vitro*.

374 Our data further revealed that +SPW and –SPW  $\text{Ca}^{2+}$  clusters were differentially modulated  
375 by local  $\text{GABA}_A$ R inhibition. Specifically, gabazine substantially increased the frequency of  
376 +SPW  $\text{Ca}^{2+}$  clusters, but decreased that of –SPW events (Figure 6L). This opposite  
377 dependence on GABAergic transmission can possibly explain discrepant results of two well-  
378 designed recent studies, in which either inhibitory (Valeeva et al., 2016) or excitatory (Murata  
379 et al., 2020) effects of GABA were found to dominate. Hence, we argue that  $\text{GABA}_A$ R  
380 signaling has a dual (excitatory-inhibitory) role in the neonatal CA1 circuitry. An interesting  
381 open question relates to the biophysical mechanism(s) underlying the excitatory *versus*  
382 inhibitory effects of GABA at this age. Ample theoretical and experimental evidence  
383 demonstrates that, even at the single-cell level, GABAergic depolarization may either  
384 increase or decrease neuronal firing in a manner that strongly depends on the activated  
385  $\text{GABA}_A$ R conductance in relation to  $E_{\text{GABA}}$  and the spatiotemporal patterning of synaptic  
386 inputs (Jean-Xavier et al., 2007; Kolbaev et al., 2011; Morita et al., 2006). Specifically, spindle  
387 bursts and SPWs are driven by highly synchronized glutamatergic inputs from the lateral  
388 geniculate nucleus (Ackman et al., 2012) and entorhinal cortex (Valeeva et al., 2019),  
389 respectively, while our LFP data suggest that this may be not the case with –SPW events.  
390 Though speculative, such differences in synaptic inputs might explain why –SPW  $\text{Ca}^{2+}$   
391 clusters are NKCC1-dependent, whereas spindle bursts and SPWs are not. It is hitherto  
392 unknown whether different classes of GABAergic interneurons (Pelkey et al., 2017) exert  
393 opposing network functions already in the neonatal hippocampus, as is the relative  
394 contribution of phasic *versus* tonic  $\text{GABA}_A$ R signaling.

395

396 *Two classes of network events in the neonatal CA1 in vivo*

397 Employing GCaMP-based mesoscopic  $\text{Ca}^{2+}$  imaging in combination with LFP recordings, we  
398 have identified the existence of two classes of network events in the neonatal CA1 *in vivo*.  
399 Due to space constraints, extracellular measurements were performed via a single electrode  
400 (placed in s.r.), which did not allow for reliable detection of HNOs as seen with multi-channel  
401 silicon probe recordings (Figure 5). Both +SPW and -SPW  $\text{Ca}^{2+}$  clusters were entirely AP-  
402 dependent (Figure S5), but differed in a number of basic parameters including rise kinetics,  
403 active area and amplitude (Figures 6H–6J). As compared to the neonatal visual cortex  
404 (Ackman et al., 2012; Kummer et al., 2016),  $\text{Ca}^{2+}$  clusters in CA1 generally exhibited a lower  
405 degree of spatial confinement. This was particularly prominent for +SPW events, which  
406 tended to activate virtually the entire field of view (Valeeva et al., 2020) and, in line with  
407 previous reports (Karlsson et al., 2006; Valeeva et al., 2019), frequently followed myoclonic  
408 limb/body twitches (Figure S5). Taken together, these observations suggest that SPWs may  
409 provide a pan-CA1 input signal representing, for example, somatosensory feedback from  
410 neonatal movements. Of note, -SPW events constituted about two thirds of all  $\text{Ca}^{2+}$  clusters  
411 detected in CA1 at P3–4 (Figure 6G). Since GCaMP signals reflect neuronal firing rather than  
412 sub-threshold membrane fluctuations (Kerr et al., 2005), our data indicate that a considerable  
413 fraction of APs in *Emx1*<sup>+</sup> CA1 PCs is not driven by cortically triggered SPWs (Valeeva et al.,  
414 2019). This conclusion is supported by previous electrophysiological data from freely moving  
415 rat pups (P4–6) demonstrating that ~60% of CA1 MUA bursts were not associated with SPWs  
416 (Leinekugel et al., 2002). Some -SPW  $\text{Ca}^{2+}$  clusters followed +SPW events with short delays  
417 and, hence, might reflect *tails* of MUA described previously (Leinekugel et al., 2002; Marguet  
418 et al., 2015). However, based on descriptive differences (see above) and their differential  
419 dependence on NKCC1 (Figures 5 and 6G) and GABA<sub>A</sub>R signaling (Figure 6L), we argue that  
420 -SPW events are mechanistically distinct. Based on their differential NKCC1 dependence, we

421 propose that GDPs do not represent the *in vitro* analog of SPWs recorded *in vivo*. Since (I) –  
422 SPW events resemble GDPs in their pharmacological profile and (II) GDPs are generated  
423 even in the deafferented hippocampus *in vitro* (Menendez de la Prida et al., 1998), it is  
424 tempting to speculate that –SPW  $\text{Ca}^{2+}$  clusters might emerge from and reflect a property of  
425 local intrahippocampal circuits, whereas SPW generation requires cortical input (Valeeva et  
426 al., 2019).

427

#### 428 *Developmental functions of NKCC1-dependent GABAergic depolarization*

429 We provide evidence that the maturation of a number of passive and active (Figures 4A–4E)  
430 membrane properties were unaffected by the chronic absence of NKCC1 in PCs. This  
431 suggests that compensatory changes in intrinsic excitability, previously observed in a  
432 conventional NKCC1 knockout line (Sipilä et al., 2009) or after E15–P7 pharmacological  
433 NKCC1 blockade (Wang et al., 2011), may be due to loss of NKCC1 function in other cell  
434 types such as GABAergic interneurons, or reflect secondary alterations related to NKCC1  
435 loss outside the brain. Furthermore, several basic characteristics of AMPAR- and  $\text{GABA}_A$ R-  
436 mediated synaptic transmission were unaltered in NKCC1  $\text{KO}^{\text{Emx1}}$  mice (Figures 4F–4I). This  
437 observation challenges the hypothesis of the importance of NKCC1-dependent GABAergic  
438 depolarization as a universal requirement for the NMDA receptor (NMDAR)-dependent  
439 developmental unsilencing of glutamatergic synapses (reviewed in Kirmse et al., 2018; Wang  
440 et al., 2008, 2011) – despite the fact that depolarizing GABA may facilitate NMDAR-mediated  
441 currents by attenuating their voltage-dependent  $\text{Mg}^{2+}$  block (Leinekugel et al., 1997).  
442 Collectively, our data indicate that network effects induced by NKCC1 disruption in  
443 telencephalic PCs directly result from changes in  $E_{\text{GABA}}$  (i.e.,  $[\text{Cl}^-]_i$ ). Thus, we also confirm a  
444 large body of *in vitro* (Dzhala et al., 2005; Sipilä et al., 2006; Yamada et al., 2004) and recent

445 *in vivo* (Kirmse et al., 2015; Sulis Sato et al., 2017; van Rheede et al., 2015) evidence  
446 indicating that NKCC1 maintains a relatively high  $[Cl^-]_i$  in immature neurons. Of note, NKCC1  
447 deletion did not completely abolish depolarizing responses to GABA in acute slices,  
448 suggesting that factors other than NKCC1 contribute to chloride accumulation in developing  
449 hippocampal PCs (Pfeffer et al., 2009). In addition, optical and electrophysiological  
450 measurements in adult mice demonstrated relatively subtle alterations of network dynamics in  
451 NKCC1 KO<sup>Emx1</sup> mice (Figure 7) that were not associated with overt performance deficits in  
452 several hippocampus-dependent behavioral tasks (Figure 1). These findings may also be of  
453 clinical relevance, as NKCC1 has emerged as a potential target for the treatment of  
454 neurodevelopmental disorders (Deidda et al., 2015; Marguet et al., 2015; Tyzio et al., 2014).  
455 While our study does not rule out more specific long-term developmental functions of NKCC1  
456 and/or roles of NKCC1 under pathophysiological conditions, our data converge to suggest  
457 that basal physiological NKCC1 activity is largely dispensable for several key aspects of  
458 cortical network maturation.

459

## Acknowledgments

460 We thank Ina Ingrisich and Sindy Beck for excellent technical assistance and Dr. John  
461 Dempster (University of Strathclyde, Glasgow) for adapting the software WinFluor. This work  
462 was supported by the Priority Program 1665 (HO 2156/3–1/2 to K.H., KI 1816/1–1/2 to K.K.,  
463 KI 1638/3–1/2 to S.J.K., IS63/5–1 to D.I. and HU 800/8–1/2 to C.A.H.), the Collaborative  
464 Research Center/Transregio 166 (B3 to K.H., K.K.), the Collaborative Research Center 1089  
465 (A05 to D.I., S.L.M.) and the Research Unit 3004 (KI 1816/5-1) of the German Research  
466 Foundation, the Federal Ministry of Education and Research (NEURON ACRoBAT to C.A.H.,  
467 01GQ0923 to K.H. and O.W.W.), and the Interdisciplinary Centre for Clinical Research Jena  
468 (K.K., K.H.).

469

## Author Contributions

470 K.K., K.H., C.A.H., S.J.K. and D.I. designed research with contributions from all authors. J.G.,  
471 C.Z., S.L.M, T.H., T.F., R.H., M.G. and K.K. performed experiments. K.K., J.G., C.Z., S.L.M.,  
472 T.H., T.F., V.R., M.G., C.F., A.U., R.M.N. and D.I. analyzed data. All authors contributed to  
473 the interpretation of the data. K.K., J.G., C.Z., K.H., S.L.M., D.I., C.A.H. and S.J.K. wrote the  
474 manuscript with contributions from all authors.

475

## **Declaration of Interests**

476 The authors declare no competing interests.

477

## References

- 478 Ackman, J.B., Burbridge, T.J., and Crair, M.C. (2012). Retinal waves coordinate patterned  
479 activity throughout the developing visual system. *Nature* 490, 219-225.
- 480 Allen, K., and Monyer, H. (2015). Interneuron control of hippocampal oscillations. *Curr Opin*  
481 *Neurobiol* 31, 81-87.
- 482 Antoine, M.W., Hübner, C.A., Arezzo, J.C., and Hebert, J.M. (2013). A causative link between  
483 inner ear defects and long-term striatal dysfunction. *Science* 341, 1120-1123.
- 484 Arichi, T., Whitehead, K., Barone, G., Pressler, R., Padormo, F., Edwards, A.D., and Fabrizi,  
485 L. (2017). Localization of spontaneous bursting neuronal activity in the preterm human brain  
486 with simultaneous EEG-fMRI. *eLife* 6, e27814.
- 487 Ben-Ari, Y., Cherubini, E., Corradetti, R., and Gaiarsa, J.L. (1989). Giant synaptic potentials in  
488 immature rat CA3 hippocampal neurones. *J Physiol* 416, 303-325.
- 489 Blanquie, O., Yang, J.W., Kilb, W., Sharopov, S., Sinning, A., and Luhmann, H.J. (2017).  
490 Electrical activity controls area-specific expression of neuronal apoptosis in the mouse  
491 developing cerebral cortex. *eLife* 6, e27696.
- 492 Bormann, J., Hamill, O.P., and Sakmann, B. (1987). Mechanism of anion permeation through  
493 channels gated by glycine and gamma-aminobutyric acid in mouse cultured spinal neurones.  
494 *J Physiol* 385, 243-286.
- 495 Busche, M.A., Chen, X., Henning, H.A., Reichwald, J., Staufenbiel, M., Sakmann, B., and  
496 Konnerth, A. (2012). Critical role of soluble amyloid-beta for early hippocampal hyperactivity  
497 in a mouse model of Alzheimer's disease. *Proc Natl Acad Sci U S A* 109, 8740-8745.
- 498 Che, A., Babij, R., Iannone, A.F., Fetcho, R.N., Ferrer, M., Liston, C., Fishell, G., and De  
499 Marco Garcia, N.V. (2018). Layer I Interneurons Sharpen Sensory Maps during Neonatal  
500 Development. *Neuron* 99, 98-116 e117.
- 501 Cohen, A.S., Lin, D.D., and Coulter, D.A. (2000). Protracted postnatal development of  
502 inhibitory synaptic transmission in rat hippocampal area CA1 neurons. *J Neurophysiol* 84,  
503 2465-2476.
- 504 Colonnese, M.T., Kaminska, A., Minlebaev, M., Milh, M., Bloem, B., Lescure, S., Moriette, G.,  
505 Chiron, C., Ben-Ari, Y., and Khazipov, R. (2010). A conserved switch in sensory processing  
506 prepares developing neocortex for vision. *Neuron* 67, 480-498.
- 507 Cutts, C.S., and Eglén, S.J. (2014). Detecting pairwise correlations in spike trains: an  
508 objective comparison of methods and application to the study of retinal waves. *J Neurosci* 34,  
509 14288-14303.
- 510 Deidda, G., Parrini, M., Naskar, S., Bozarth, I.F., Contestabile, A., and Cancedda, L. (2015).  
511 Reversing excitatory GABAAR signaling restores synaptic plasticity and memory in a mouse  
512 model of Down syndrome. *Nat Med* 21, 318-326.



- 513 Delpire, E., Lu, J., England, R., Dull, C., and Thorne, T. (1999). Deafness and imbalance  
514 associated with inactivation of the secretory Na-K-2Cl co-transporter. *Nat Genet* 22, 192-195.
- 515 Doyon, N., Vinay, L., Prescott, S.A., and De Koninck, Y. (2016). Chloride Regulation: A  
516 Dynamic Equilibrium Crucial for Synaptic Inhibition. *Neuron* 89, 1157-1172.
- 517 Dzhala, V.I., Talos, D.M., Sdrulla, D.A., Brumback, A.C., Mathews, G.C., Benke, T.A., Delpire,  
518 E., Jensen, F.E., and Staley, K.J. (2005). NKCC1 transporter facilitates seizures in the  
519 developing brain. *Nat Med* 11, 1205-1213.
- 520 Fazeli, W., Zappettini, S., Marguet, S.L., Grendel, J., Esclapez, M., Bernard, C., and Isbrandt,  
521 D. (2017). Early-life exposure to caffeine affects the construction and activity of cortical  
522 networks in mice. *Exp Neurol* 295, 88-103.
- 523 Flossmann, T., Kaas, T., Rahmati, V., Kiebel, S.J., Witte, O.W., Holthoff, K., and Kirmse, K.  
524 (2019). Somatostatin Interneurons Promote Neuronal Synchrony in the Neonatal  
525 Hippocampus. *Cell Rep* 26, 3173-3182.
- 526 Frahm, C., Srivastava, A., Schmidt, S., Mueller, J., Groth, M., Guenther, M., Ji, Y., Priebe, S.,  
527 Platzer, M., and Witte, O.W. (2017). Transcriptional profiling reveals protective mechanisms in  
528 brains of long-lived mice. *Neurobiol Aging* 52, 23-31.
- 529 Gu, Z., Alexander, G.M., Dudek, S.M., and Yakel, J.L. (2017). Hippocampus and Entorhinal  
530 Cortex Recruit Cholinergic and NMDA Receptors Separately to Generate Hippocampal Theta  
531 Oscillations. *Cell Rep* 21, 3585-3595.
- 532 Han, B., Bellemer, A., and Koelle, M.R. (2015). An evolutionarily conserved switch in  
533 response to GABA affects development and behavior of the locomotor circuit of  
534 *Caenorhabditis elegans*. *Genetics* 199, 1159-1172.
- 535 Jean-Xavier, C., Mentis, G.Z., O'Donovan, M.J., Cattaert, D., and Vinay, L. (2007). Dual  
536 personality of GABA/glycine-mediated depolarizations in immature spinal cord. *Proc Natl  
537 Acad Sci U S A* 104, 11477-11482.
- 538 Karlsson, K.A., Mohns, E.J., di Prisco, G.V., and Blumberg, M.S. (2006). On the co-  
539 occurrence of startles and hippocampal sharp waves in newborn rats. *Hippocampus* 16, 959-  
540 965.
- 541 Kerr, J.N., Greenberg, D., and Helmchen, F. (2005). Imaging input and output of neocortical  
542 networks in vivo. *Proc Natl Acad Sci U S A* 102, 14063-14068.
- 543 Khazipov, R., Sirota, A., Leinekugel, X., Holmes, G.L., Ben-Ari, Y., and Buzsaki, G. (2004).  
544 Early motor activity drives spindle bursts in the developing somatosensory cortex. *Nature* 432,  
545 758-761.
- 546 Kirischuk, S., Sinning, A., Blanquie, O., Yang, J.W., Luhmann, H.J., and Kilb, W. (2017).  
547 Modulation of Neocortical Development by Early Neuronal Activity: Physiology and  
548 Pathophysiology. *Front Cell Neurosci* 11, 379.

- 549 Kirmse, K., Hübner, C.A., Isbrandt, D., Witte, O.W., and Holthoff, K. (2018). GABAergic  
550 Transmission during Brain Development: Multiple Effects at Multiple Stages. *Neuroscientist*  
551 *24*, 36-53.
- 552 Kirmse, K., Kummer, M., Kovalchuk, Y., Witte, O.W., Garaschuk, O., and Holthoff, K. (2015).  
553 GABA depolarizes immature neurons and inhibits network activity in the neonatal neocortex in  
554 vivo. *Nat Commun* *6*, 7750.
- 555 Kolbaev, S.N., Achilles, K., Luhmann, H.J., and Kilb, W. (2011). Effect of depolarizing  
556 GABA(A)-mediated membrane responses on excitability of Cajal-Retzius cells in the  
557 immature rat neocortex. *J Neurophysiol* *106*, 2034-2044.
- 558 Krnjevic, K., and Phillis, J.W. (1963). Ionophoretic studies of neurones in the mammalian  
559 cerebral cortex. *J Physiol* *165*, 274-304.
- 560 Kummer, M., Kirmse, K., Zhang, C., Haueisen, J., Witte, O.W., and Holthoff, K. (2016).  
561 Column-like Ca(2+) clusters in the mouse neonatal neocortex revealed by three-dimensional  
562 two-photon Ca(2+) imaging in vivo. *Neuroimage* *138*, 64-75.
- 563 Leighton, A.H., and Lohmann, C. (2016). The Wiring of Developing Sensory Circuits-From  
564 Patterned Spontaneous Activity to Synaptic Plasticity Mechanisms. *Front Neural Circuits* *10*,  
565 71.
- 566 Leinekugel, X., Khazipov, R., Cannon, R., Hirase, H., Ben-Ari, Y., and Buzsaki, G. (2002).  
567 Correlated bursts of activity in the neonatal hippocampus in vivo. *Science* *296*, 2049-2052.
- 568 Leinekugel, X., Medina, I., Khalilov, I., Ben-Ari, Y., and Khazipov, R. (1997). Ca<sup>2+</sup> oscillations  
569 mediated by the synergistic excitatory actions of GABA(A) and NMDA receptors in the  
570 neonatal hippocampus. *Neuron* *18*, 243-255.
- 571 Löscher, W., Puskarjov, M., and Kaila, K. (2013). Cation-chloride cotransporters NKCC1 and  
572 KCC2 as potential targets for novel antiepileptic and antiepileptogenic treatments.  
573 *Neuropharmacology* *69*, 62-74.
- 574 Lubenov, E.V., and Siapas, A.G. (2009). Hippocampal theta oscillations are travelling waves.  
575 *Nature* *459*, 534-539.
- 576 Luhmann, H.J., and Prince, D.A. (1991). Postnatal maturation of the GABAergic system in rat  
577 neocortex. *J Neurophysiol* *65*, 247-263.
- 578 Marguet, S.L., Le-Schulte, V.T., Merseburg, A., Neu, A., Eichler, R., Jakovcevski, I., Ivanov,  
579 A., Hanganu-Opatz, I.L., Bernard, C., Morellini, F., and Isbrandt, D. (2015). Treatment during  
580 a vulnerable developmental period rescues a genetic epilepsy. *Nat Med* *21*, 1436-1444.
- 581 Menendez de la Prida, L., Bolea, S., and Sanchez-Andres, J.V. (1998). Origin of the  
582 synchronized network activity in the rabbit developing hippocampus. *Eur J Neurosci* *10*, 899-  
583 906.
- 584 Minlebaev, M., Ben-Ari, Y., and Khazipov, R. (2007). Network mechanisms of spindle-burst  
585 oscillations in the neonatal rat barrel cortex in vivo. *J Neurophysiol* *97*, 692-700.

- 586 Mizrahi, A., Crowley, J.C., Shtoyerman, E., and Katz, L.C. (2004). High-resolution in vivo  
587 imaging of hippocampal dendrites and spines. *J Neurosci* 24, 3147-3151.
- 588 Morita, K., Tsumoto, K., and Aihara, K. (2006). Bidirectional modulation of neuronal  
589 responses by depolarizing GABAergic inputs. *Biophys J* 90, 1925-1938.
- 590 Murata, Y., and Colonnese, M.T. (2020). GABAergic interneurons excite neonatal  
591 hippocampus in vivo. *Science Advances* 6.
- 592 Oh, W.C., Lutz, S., Castillo, P.E., and Kwon, H.B. (2016). De novo synaptogenesis induced  
593 by GABA in the developing mouse cortex. *Science* 353, 1037-1040.
- 594 Pelkey, K.A., Chittajallu, R., Craig, M.T., Tricoire, L., Wester, J.C., and McBain, C.J. (2017).  
595 Hippocampal GABAergic Inhibitory Interneurons. *Physiol Rev* 97, 1619-1747.
- 596 Perkins, K.L. (2006). Cell-attached voltage-clamp and current-clamp recording and  
597 stimulation techniques in brain slices. *J Neurosci Methods* 154, 1-18.
- 598 Pfeffer, C.K., Stein, V., Keating, D.J., Maier, H., Rinke, I., Rudhard, Y., Hentschke, M., Rune,  
599 G.M., Jentsch, T.J., and Hübner, C.A. (2009). NKCC1-dependent GABAergic excitation drives  
600 synaptic network maturation during early hippocampal development. *J Neurosci* 29, 3419-  
601 3430.
- 602 Rahmati, V., Kirmse, K., Holthoff, K., and Kiebel, S.J. (2018). Ultra-fast accurate  
603 reconstruction of spiking activity from calcium imaging data. *J Neurophysiol* 119, 1863-1878.
- 604 Rheims, S., Minlebaev, M., Ivanov, A., Represa, A., Khazipov, R., Holmes, G.L., Ben-Ari, Y.,  
605 and Zilberter, Y. (2008). Excitatory GABA in rodent developing neocortex in vitro. *J*  
606 *Neurophysiol* 100, 609-619.
- 607 Rivera, C., Voipio, J., Payne, J.A., Ruusuvuori, E., Lahtinen, H., Lamsa, K., Pirvola, U.,  
608 Saarma, M., and Kaila, K. (1999). The K<sup>+</sup>/Cl<sup>-</sup> co-transporter KCC2 renders GABA  
609 hyperpolarizing during neuronal maturation. *Nature* 397, 251-255.
- 610 Rochefort, N.L., Garaschuk, O., Milos, R.I., Narushima, M., Marandi, N., Pichler, B.,  
611 Kovalchuk, Y., and Konnerth, A. (2009). Sparsification of neuronal activity in the visual cortex  
612 at eye-opening. *Proc Natl Acad Sci U S A* 106, 15049-15054.
- 613 Sipilä, S.T., Huttu, K., Yamada, J., Afzalov, R., Voipio, J., Blaesse, P., and Kaila, K. (2009).  
614 Compensatory enhancement of intrinsic spiking upon NKCC1 disruption in neonatal  
615 hippocampus. *J Neurosci* 29, 6982-6988.
- 616 Sipilä, S.T., Schuchmann, S., Voipio, J., Yamada, J., and Kaila, K. (2006). The cation-chloride  
617 cotransporter NKCC1 promotes sharp waves in the neonatal rat hippocampus. *J Physiol* 573,  
618 765-773.
- 619 Spoljaric, A., Seja, P., Spoljaric, I., Virtanen, M.A., Lindfors, J., Uvarov, P., Summanen, M.,  
620 Crow, A.K., Hsueh, B., Puskarjov, M., *et al.* (2017). Vasopressin excites interneurons to  
621 suppress hippocampal network activity across a broad span of brain maturity at birth. *Proc*  
622 *Natl Acad Sci U S A* 114, E10819-E10828.

- 623 Stosiek, C., Garaschuk, O., Holthoff, K., and Konnerth, A. (2003). In vivo two-photon calcium  
624 imaging of neuronal networks. *Proc Natl Acad Sci U S A* *100*, 7319-7324.
- 625 Stubblefield, E.A., and Benke, T.A. (2010). Distinct AMPA-type glutamatergic synapses in  
626 developing rat CA1 hippocampus. *J Neurophysiol* *104*, 1899-1912.
- 627 Sulis Sato, S., Artoni, P., Landi, S., Cozzolino, O., Parra, R., Pracucci, E., Trovato, F.,  
628 Szczurkowska, J., Luin, S., Arosio, D., *et al.* (2017). Simultaneous two-photon imaging of  
629 intracellular chloride concentration and pH in mouse pyramidal neurons in vivo. *Proc Natl*  
630 *Acad Sci U S A* *114*, E8770-E8779.
- 631 Tort, A.B., Kramer, M.A., Thorn, C., Gibson, D.J., Kubota, Y., Graybiel, A.M., and Kopell, N.J.  
632 (2008). Dynamic cross-frequency couplings of local field potential oscillations in rat striatum  
633 and hippocampus during performance of a T-maze task. *Proc Natl Acad Sci U S A* *105*,  
634 20517-20522.
- 635 Tyzio, R., Nardou, R., Ferrari, D.C., Tsintsadze, T., Shahrokhi, A., Eftekhari, S., Khalilov, I.,  
636 Tsintsadze, V., Brouchoud, C., Chazal, G., *et al.* (2014). Oxytocin-mediated GABA inhibition  
637 during delivery attenuates autism pathogenesis in rodent offspring. *Science* *343*, 675-679.
- 638 Valeeva, G., Janackova, S., Nasretdinov, A., Rychkova, V., Makarov, R., Holmes, G.L.,  
639 Khazipov, R., and Lenck-Santini, P.P. (2019). Emergence of Coordinated Activity in the  
640 Developing Entorhinal-Hippocampal Network. *Cereb Cortex* *29*, 906-920.
- 641 Valeeva, G., Rychkova, V., Vinokurova, D., Nasretdinov, A., and Khazipov, R. (2020). Early  
642 sharp wave synchronization along the septo-temporal axis of the neonatal rat hippocampus.  
643 *ЖУРНАЛ ВЫСШЕЙ НЕРВНОЙ ДЕЯТЕЛЬНОСТИ ИМ ИП ПАВЛОВА* *70*, 341-350.
- 644 Valeeva, G., Tressard, T., Mukhtarov, M., Baude, A., and Khazipov, R. (2016). An  
645 Optogenetic Approach for Investigation of Excitatory and Inhibitory Network GABA Actions in  
646 Mice Expressing Channelrhodopsin-2 in GABAergic Neurons. *J Neurosci* *36*, 5961-5973.
- 647 van Rheede, J.J., Richards, B.A., and Akerman, C.J. (2015). Sensory-Evoked Spiking  
648 Behavior Emerges via an Experience-Dependent Plasticity Mechanism. *Neuron* *87*, 1050-  
649 1062.
- 650 Wang, D.D., and Kriegstein, A.R. (2008). GABA regulates excitatory synapse formation in the  
651 neocortex via NMDA receptor activation. *J Neurosci* *28*, 5547-5558.
- 652 Wang, D.D., and Kriegstein, A.R. (2011). Blocking early GABA depolarization with  
653 bumetanide results in permanent alterations in cortical circuits and sensorimotor gating  
654 deficits. *Cereb Cortex* *21*, 574-587.
- 655 Wester, J.C., and McBain, C.J. (2016). Interneurons Differentially Contribute to Spontaneous  
656 Network Activity in the Developing Hippocampus Dependent on Their Embryonic Lineage. *J*  
657 *Neurosci* *36*, 2646-2662.
- 658 Winnubst, J., Cheyne, J.E., Niculescu, D., and Lohmann, C. (2015). Spontaneous Activity  
659 Drives Local Synaptic Plasticity In Vivo. *Neuron* *87*, 399-410.

- 660 Yamada, J., Okabe, A., Toyoda, H., Kilb, W., Luhmann, H.J., and Fukuda, A. (2004). Cl-  
661 uptake promoting depolarizing GABA actions in immature rat neocortical neurones is  
662 mediated by NKCC1. *J Physiol* 557, 829-841.
- 663 Zhang, C., Yang, S., Flossmann, T., Gao, S., Witte, O.W., Nagel, G., Holthoff, K., and Kirmse,  
664 K. (2019). Optimized photo-stimulation of halorhodopsin for long-term neuronal inhibition.  
665 *BMC biology* 17, 95.
- 666 Zhang, J., Ackman, J.B., Xu, H.P., and Crair, M.C. (2011). Visual map development depends  
667 on the temporal pattern of binocular activity in mice. *Nat Neurosci* 15, 298-307.
- 668 Zhu, L., Polley, N., Mathews, G.C., and Delpire, E. (2008). NKCC1 and KCC2 prevent  
669 hyperexcitability in the mouse hippocampus. *Epilepsy Res* 79, 201-212.

670

## Figures and legends

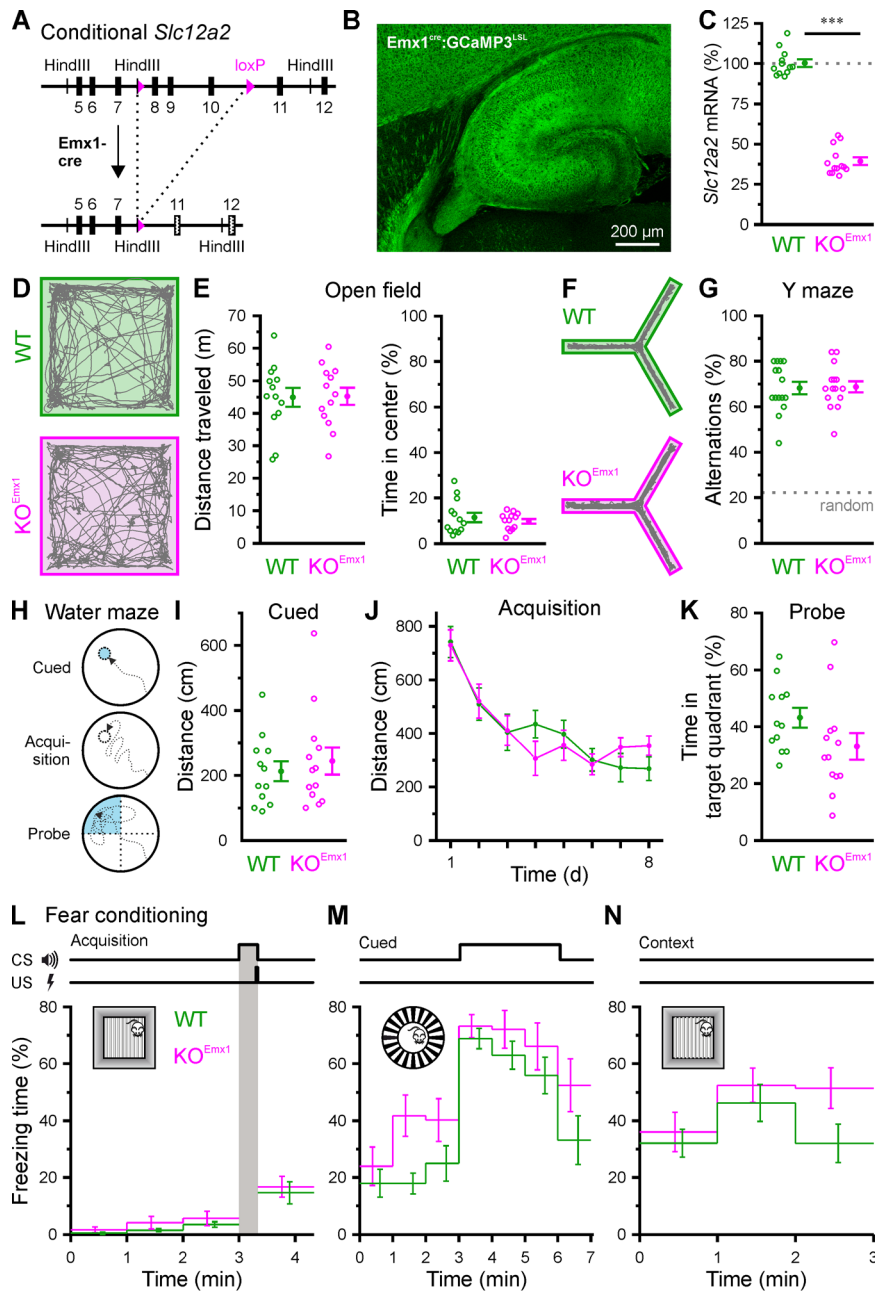

671

672 **Figure 1.** Behavioral performance of mice in the absence of NKCC1 from telencephalic  
 673 glutamatergic cells. (A) In the targeted *Slc12a2* locus, exons 8–10 are flanked by loxP sites.  
 674 Cre-dependent recombination causes a frameshift (dotted exons) and introduces a stop  
 675 codon in exon 12. (B) Confocal image demonstrating Cre-reporter expression (GCaMP3) in a  
 676 fixed horizontal brain slice obtained from an *Emx1<sup>IRScree</sup>;Ai38* mouse at P4. (C) Hippocampal

677 *Slc12a2* mRNA levels compared to the geometric mean of WT, normalized to *Gapdh* and  
678 *Hmbs*. (D) Sample trajectories of mice in the open field. (E) Total distance covered and  
679 relative time the animals spent in the center. (F) Sample trajectories of mice in the Y maze.  
680 (G) Spontaneous alternations (dotted line indicates chance level). (H) Experimental design of  
681 the Morris water maze. (I, J) Distance to platform for cued trial (visible platform) and  
682 acquisition (hidden platform). (K) Time in target quadrant during probe trial (no platform). (L–  
683 N) Freezing time during fear conditioning (L), and during re-exposure to the cue (M) and  
684 context (N). (C–K) Each open circle represents a single animal. (E–N) Data are presented as  
685 mean  $\pm$  SEM. CS – conditioned stimulus, US – unconditioned stimulus, \*\*\*  $P < 0.001$ . See  
686 also Figure S1 and Table S1.

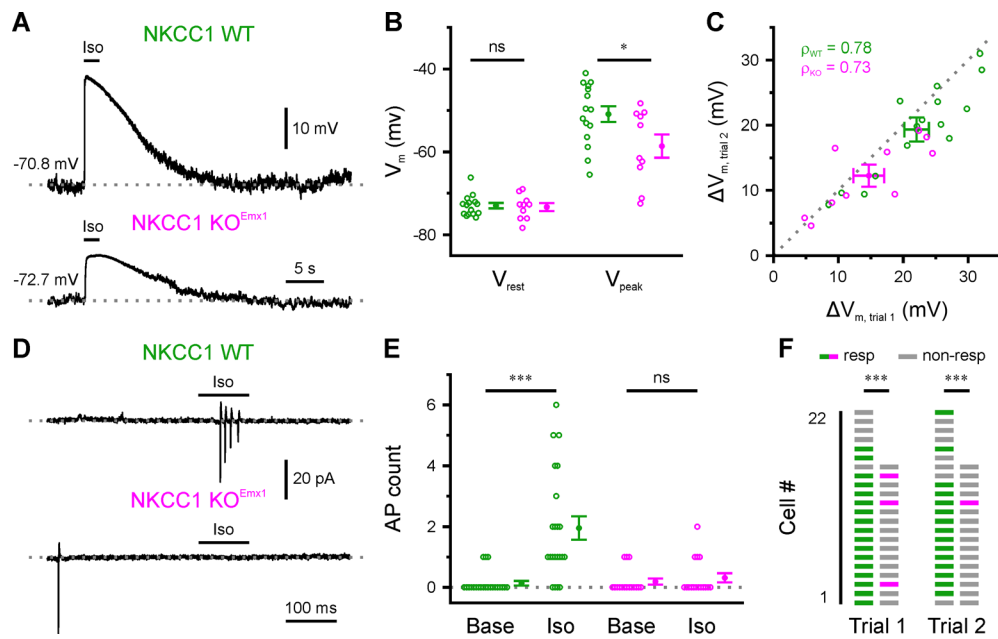

687

688 **Figure 2.** Loss of NKCC1 attenuates the depolarizing action of GABA. (A) Sample gramicidin  
 689 perforated-patch current-clamp recordings in response to puff application of isoguvacine (Iso).  
 690 (B) Quantification of resting ( $V_{rest}$ ) and peak isoguvacine-induced ( $V_{peak}$ ) membrane potential.  
 691 (C) Correlation of isoguvacine-induced membrane potential changes ( $\Delta V_m$ ) in two successive  
 692 trials.  $\rho$  – Spearman's rank correlation coefficient. (D) Sample cell-attached recordings in  
 693 response to puff-application of isoguvacine. (E) Number of action currents detected in 300-ms  
 694 intervals immediately before (Base) and after (Iso) puff onset. (F) The fraction of responsive  
 695 cells (resp) was significantly smaller for cells from  $KO^{Emx1}$  mice. Each open circle represents a  
 696 single cell. Data are presented as mean  $\pm$  SEM. ns – not significant, \*  $P < 0.05$ , \*\*\*  $P < 0.001$ .  
 697 See also Figure S2 and Table S2.



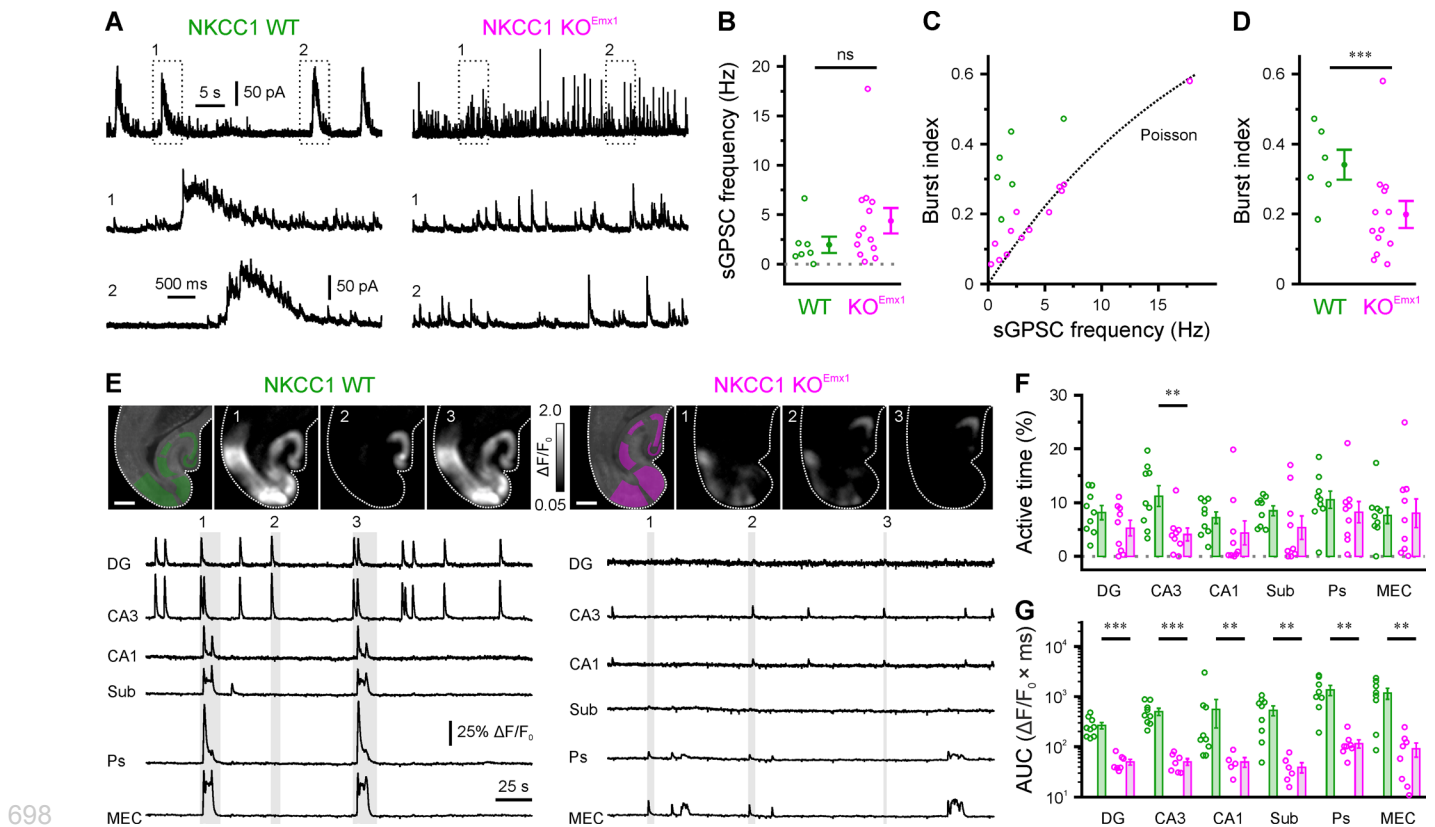

698

699 **Figure 3.** PC-specific NKCC1 deletion impairs spontaneous hippocampal network activity *in*  
700 *vitro*. (A) Sample whole-cell recordings of sGPSCs isolated by their reversal potential. (B)  
701 Quantification of sGPSC frequency. (C) Burst index as a function of sGPSC frequency. The  
702 dotted line represents the expected value for stochastic event trains following a Poisson point  
703 process. (D) Quantification of burst indices. (E) GCaMP-based confocal imaging of  
704 spontaneous network activity in cortico-hippocampal slices. *Top*: GCaMP3 fluorescence  
705 overlaid with regions of interest used for analysis (left) and sample  $\Delta F/F_0$  images for time  
706 periods indicated below (scale bars, 500  $\mu\text{m}$ ). *Bottom*:  $\Delta F/F_0$  sample traces. (F–G)  
707 Quantification of total active time (F) and mean area under the curve per cluster event (AUC,  
708 G). Open circles represent single cells (B–D) or slices (F–G). Data are presented as mean  $\pm$   
709 SEM. ns – not significant, \*  $P < 0.05$ , \*\*  $P < 0.01$ , \*\*\*  $P < 0.001$ . See also Figure S3 and  
710 Table S3.

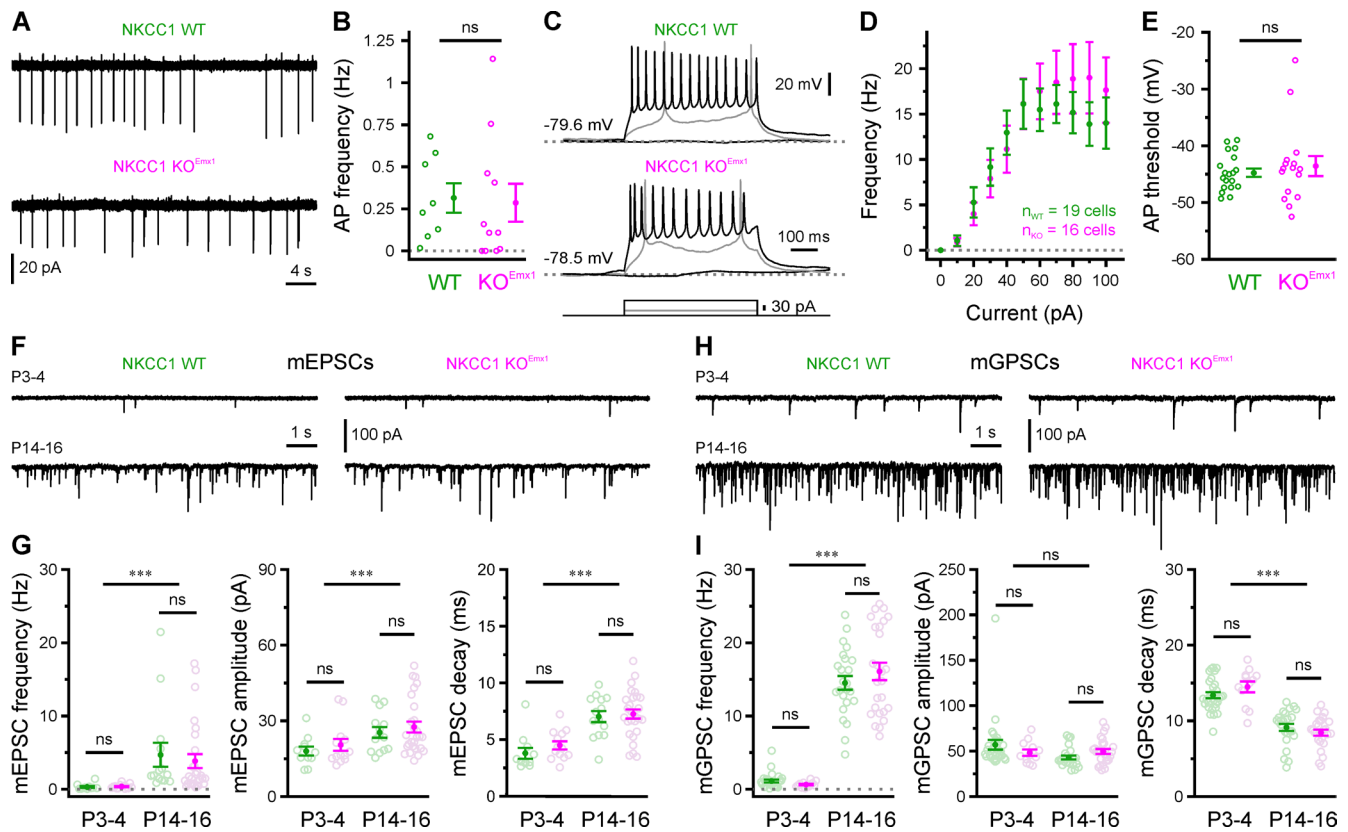

711

712

713

714

715

716

717

718

719

720

721

722

723

**Figure 4.** NKCC1 effects on hippocampal network dynamics are not accounted for by alterations in intrinsic excitability or basic synaptic properties. (A) Sample cell-attached recordings of spontaneous AP firing in the presence of ionotropic glutamate and GABA receptor antagonists. (B) Mean spontaneous AP frequency. (C) Sample whole-cell current-clamp recordings in response to current injections. (D–E) Current-frequency relationship (D) and AP threshold (E) are not altered in NKCC1 KO<sup>Emx1</sup> mice. (F) Sample voltage-clamp measurements demonstrating AMPAR-dependent mEPSCs at P3–4 and P14–16. (G) Mean mEPSC frequency, median mEPSC amplitude and mean mEPSC decay time constant. (H) Sample voltage-clamp measurements demonstrating mGPSCs at P3–4 and P14–16. (I) Mean mGPSC frequency, median mGPSC amplitude and mean mGPSC decay time constant. Each open circle represents a single cell. Data are presented as mean ± SEM. ns – not significant,

\*\*\* P < 0.001. See also Table S4.

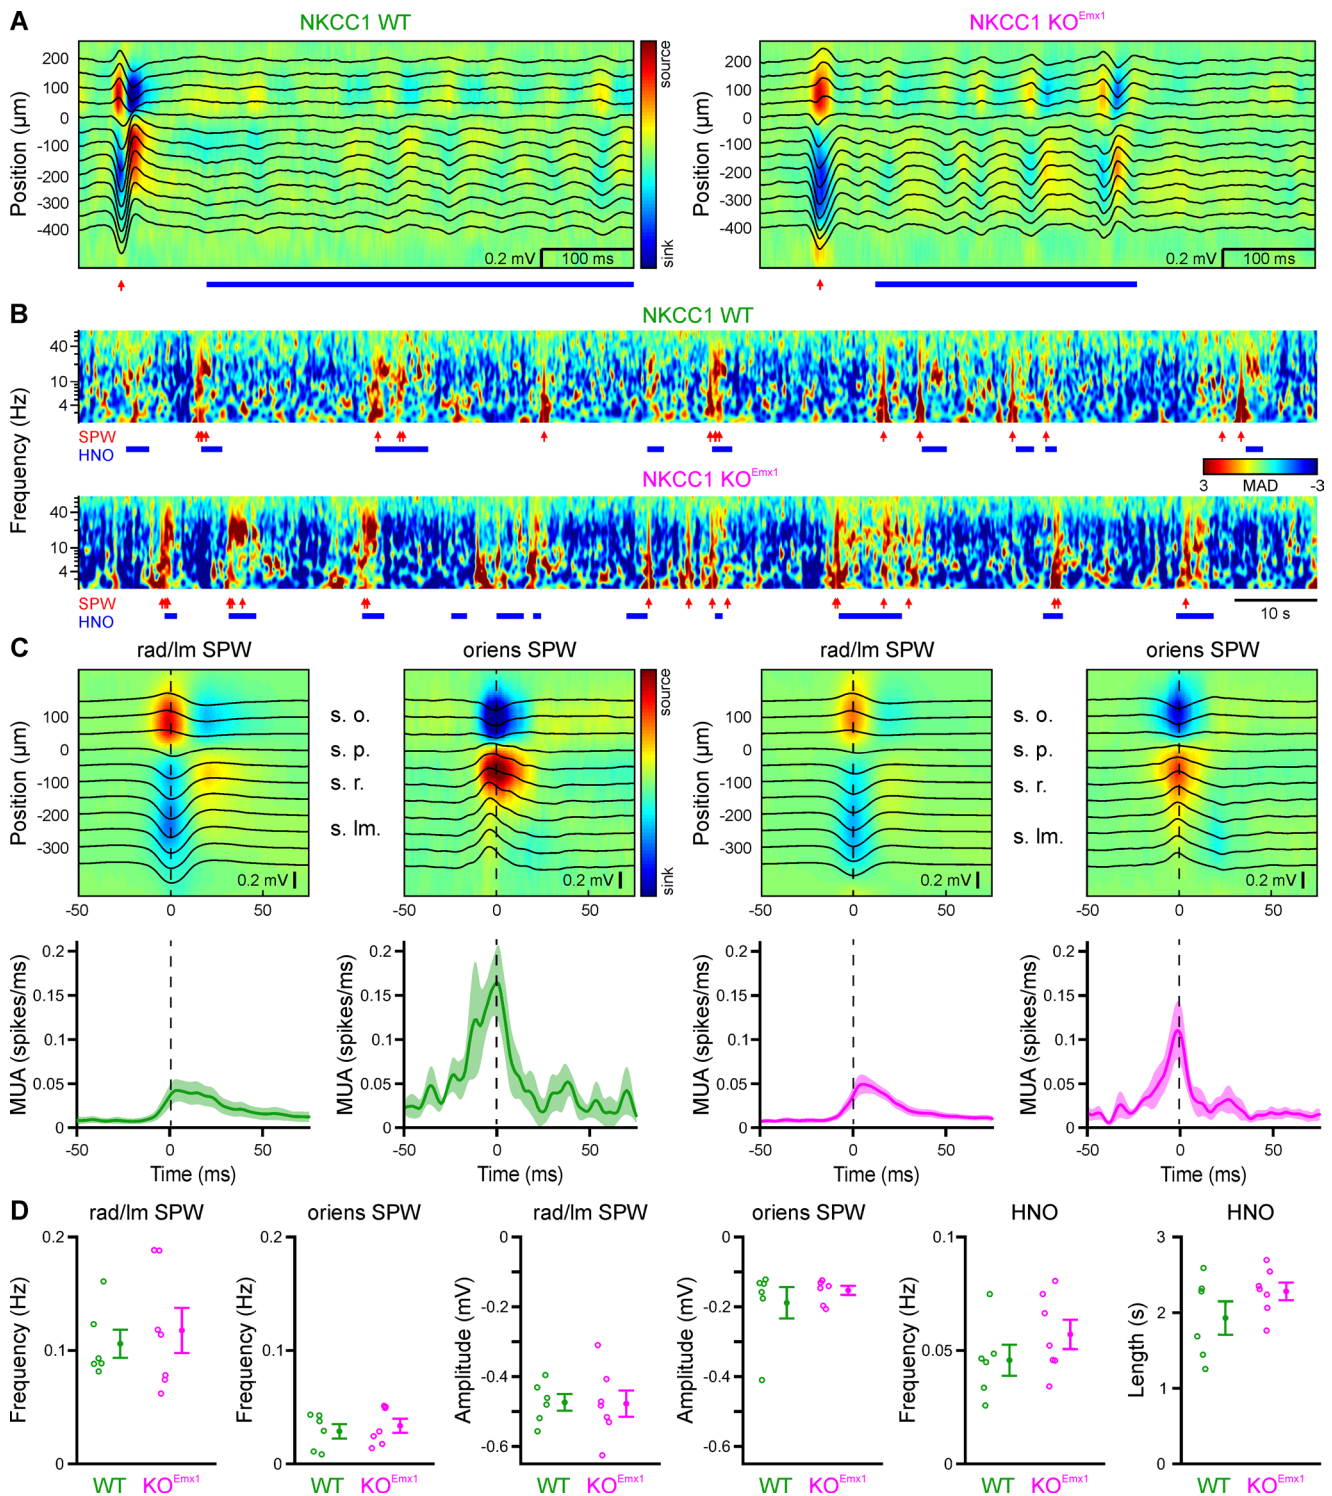

724

725 **Figure 5.** Hippocampal sharp waves *in vivo* at P4 persist in the conditional absence of  
 726 NKCC1. (A) Example SPW (red arrow) and beta-frequency (~10–30 Hz range) hippocampal  
 727 network oscillation (HNO, blue line) recorded by linear silicon probes with 50  $\mu\text{m}$  contact

728 spacing, spanning the hippocampal layers. LFP traces (black) are superimposed over the  
729 current source density (CSD). 0  $\mu\text{m}$  represents the field reversal of s.p. (B) Example 150 s  
730 wavelet spectrograms of CSD in s.l.m. in median absolute deviation (MAD) units per  
731 frequency. Events are marked as in (A) and (B). (C) Median LFP and CSD depicted from  
732 SPWs with sinks either below ('rad/lm', left) or above ('oriens', right) s.p. Left two panels are  
733 from a WT, and right two are from a  $\text{KO}^{\text{Emx1}}$  mouse. Lower panels display the SPW trough-  
734 aligned average multi-unit activity (MUA) for all sets with at least 10 events of that type  
735 present. (D) Summary statistics for the frequency and amplitude of rad/lm and oriens SPWs  
736 across all NKCC1 WT and  $\text{KO}^{\text{Emx1}}$  mice recorded. For HNOs the occurrence frequency as  
737 well as average duration is shown. Each open circle represents a single animal. Data are  
738 presented as mean  $\pm$  SEM. See also Figure S4 and Table S5.

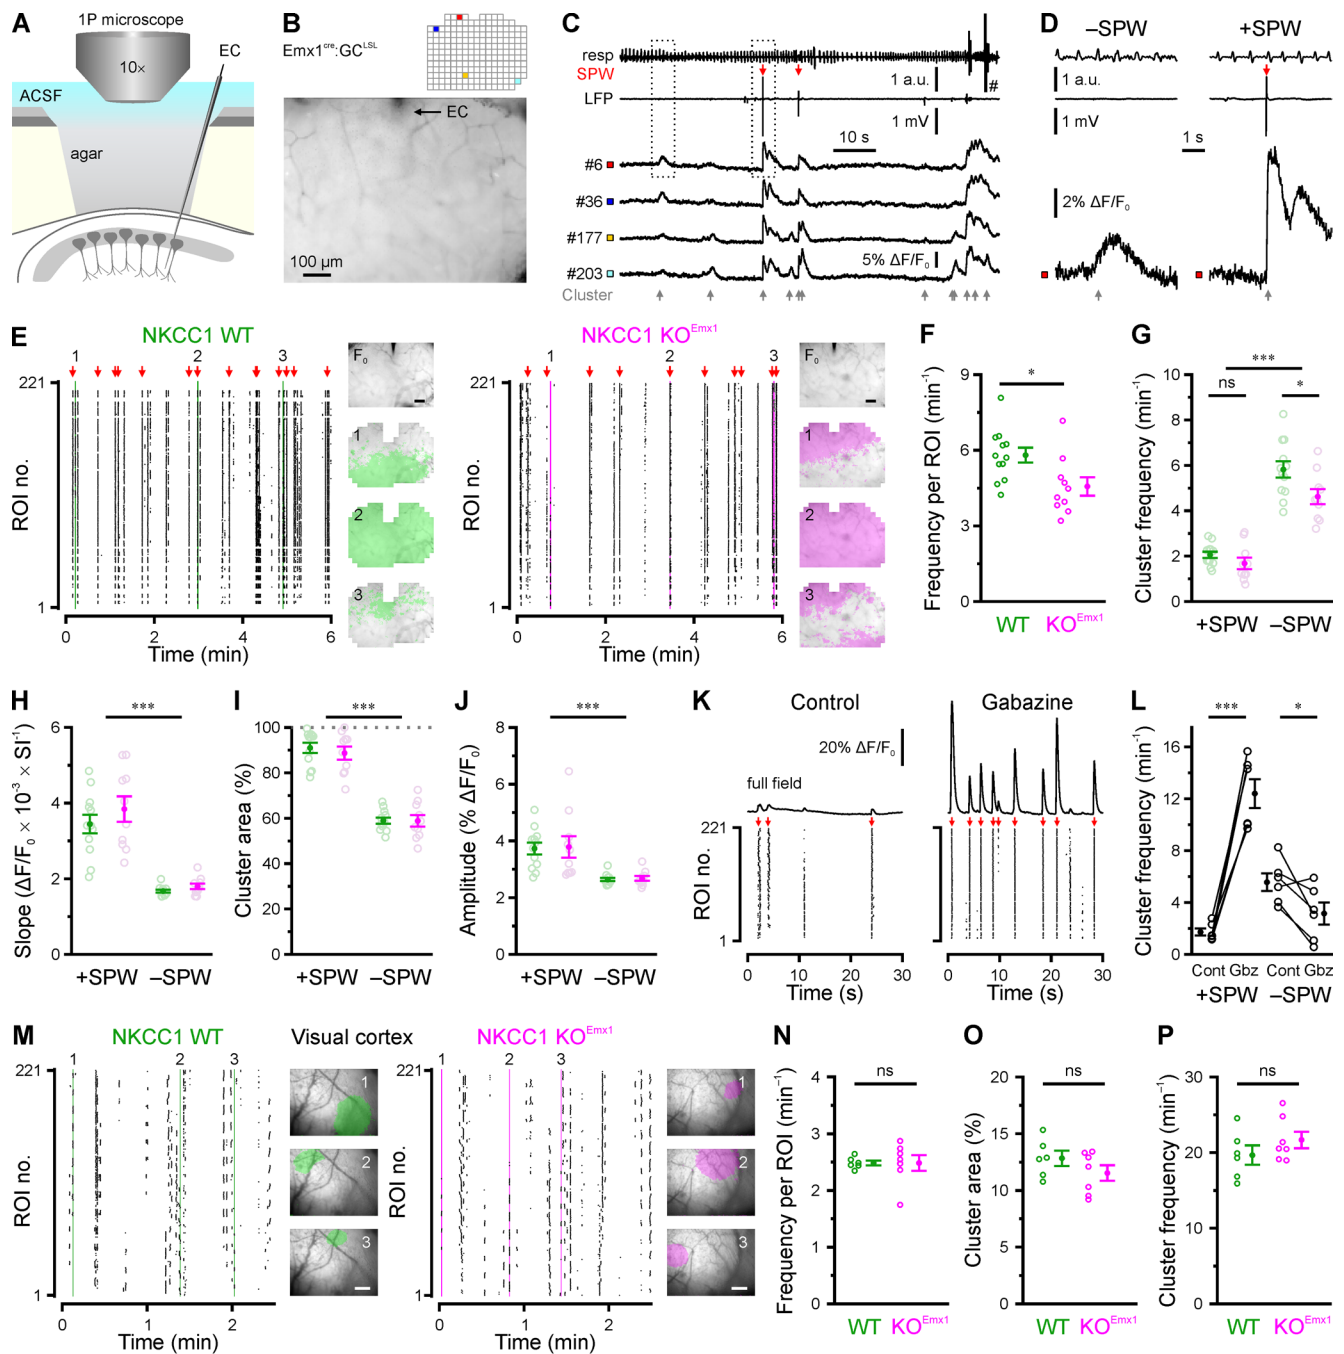

739

740 **Figure 6.** NKCC1 promotes correlated network activity in an event type- and region-specific  
 741 manner *in vivo*. (A) Experimental set-up combining wide-field  $Ca^{2+}$  imaging and local field  
 742 potential recording in CA1. EC – extracellular electrode. (B) Resting GCaMP fluorescence  
 743 and grid of ROIs used for analysis. (C) Time-aligned GCaMP fluorescence (ROIs indicated in  
 744 B), LFP (band-pass-filtered at 0.5–100 Hz) and respiration/movement (resp) signal.  $Ca^{2+}$

745 clusters are indicated by gray, SPWs by red arrows. Note that CaTs are detected with or  
746 without a concurrent SPW. (D) Boxed regions marked in C at higher magnification. Note that  
747 SPW-related CaTs (+SPWs) display faster rise kinetics and higher amplitudes as compared  
748 to SPW-unrelated CaTs (–SPW). (E) Raster plots indicating CaT times per ROI from WT and  
749 KO<sup>Emx1</sup> mice. Insets: Resting GCaMP fluorescence ( $F_0$ ) and binary area plots of Ca<sup>2+</sup> clusters  
750 indicated on the left. (F) In NKCC1 KO<sup>Emx1</sup> mice, mean CaT frequencies per ROI were  
751 significantly reduced. (G) Conditional NKCC1 deletion reduced the frequency of –SPW Ca<sup>2+</sup>  
752 clusters. (H–J) +SPW and –SPW Ca<sup>2+</sup> clusters display differences in rise kinetics (H), cluster  
753 area (I) and amplitude (J). SI – sampling interval. (K) Sample  $\Delta F/F_0$  traces (mean of all  
754 analyzed ROIs) and time-aligned raster plots before and after local superfusion of gabazine  
755 (40  $\mu$ M). Red arrows indicate SPWs. (L) Quantification of +SPW and –SPW Ca<sup>2+</sup> cluster  
756 frequencies. (M) Sample raster plots demonstrating cluster activity in the visual neocortex as  
757 measured through the intact skull. Insets: Transcranial GCaMP fluorescence overlaid with  
758 binary area plots of three spatially confined cluster events indicated on the left (scale bars,  
759 200  $\mu$ m). (N–P) Quantification of the average CaT frequency per ROI (N), mean cluster area  
760 (O) and cluster frequency (P). Each open circle represents a single animal. Data are  
761 presented as mean  $\pm$  SEM. ns – not significant, \*  $P < 0.05$ , \*\*\*  $P < 0.001$ . See also Figures S5  
762 and S6 and Table S6.

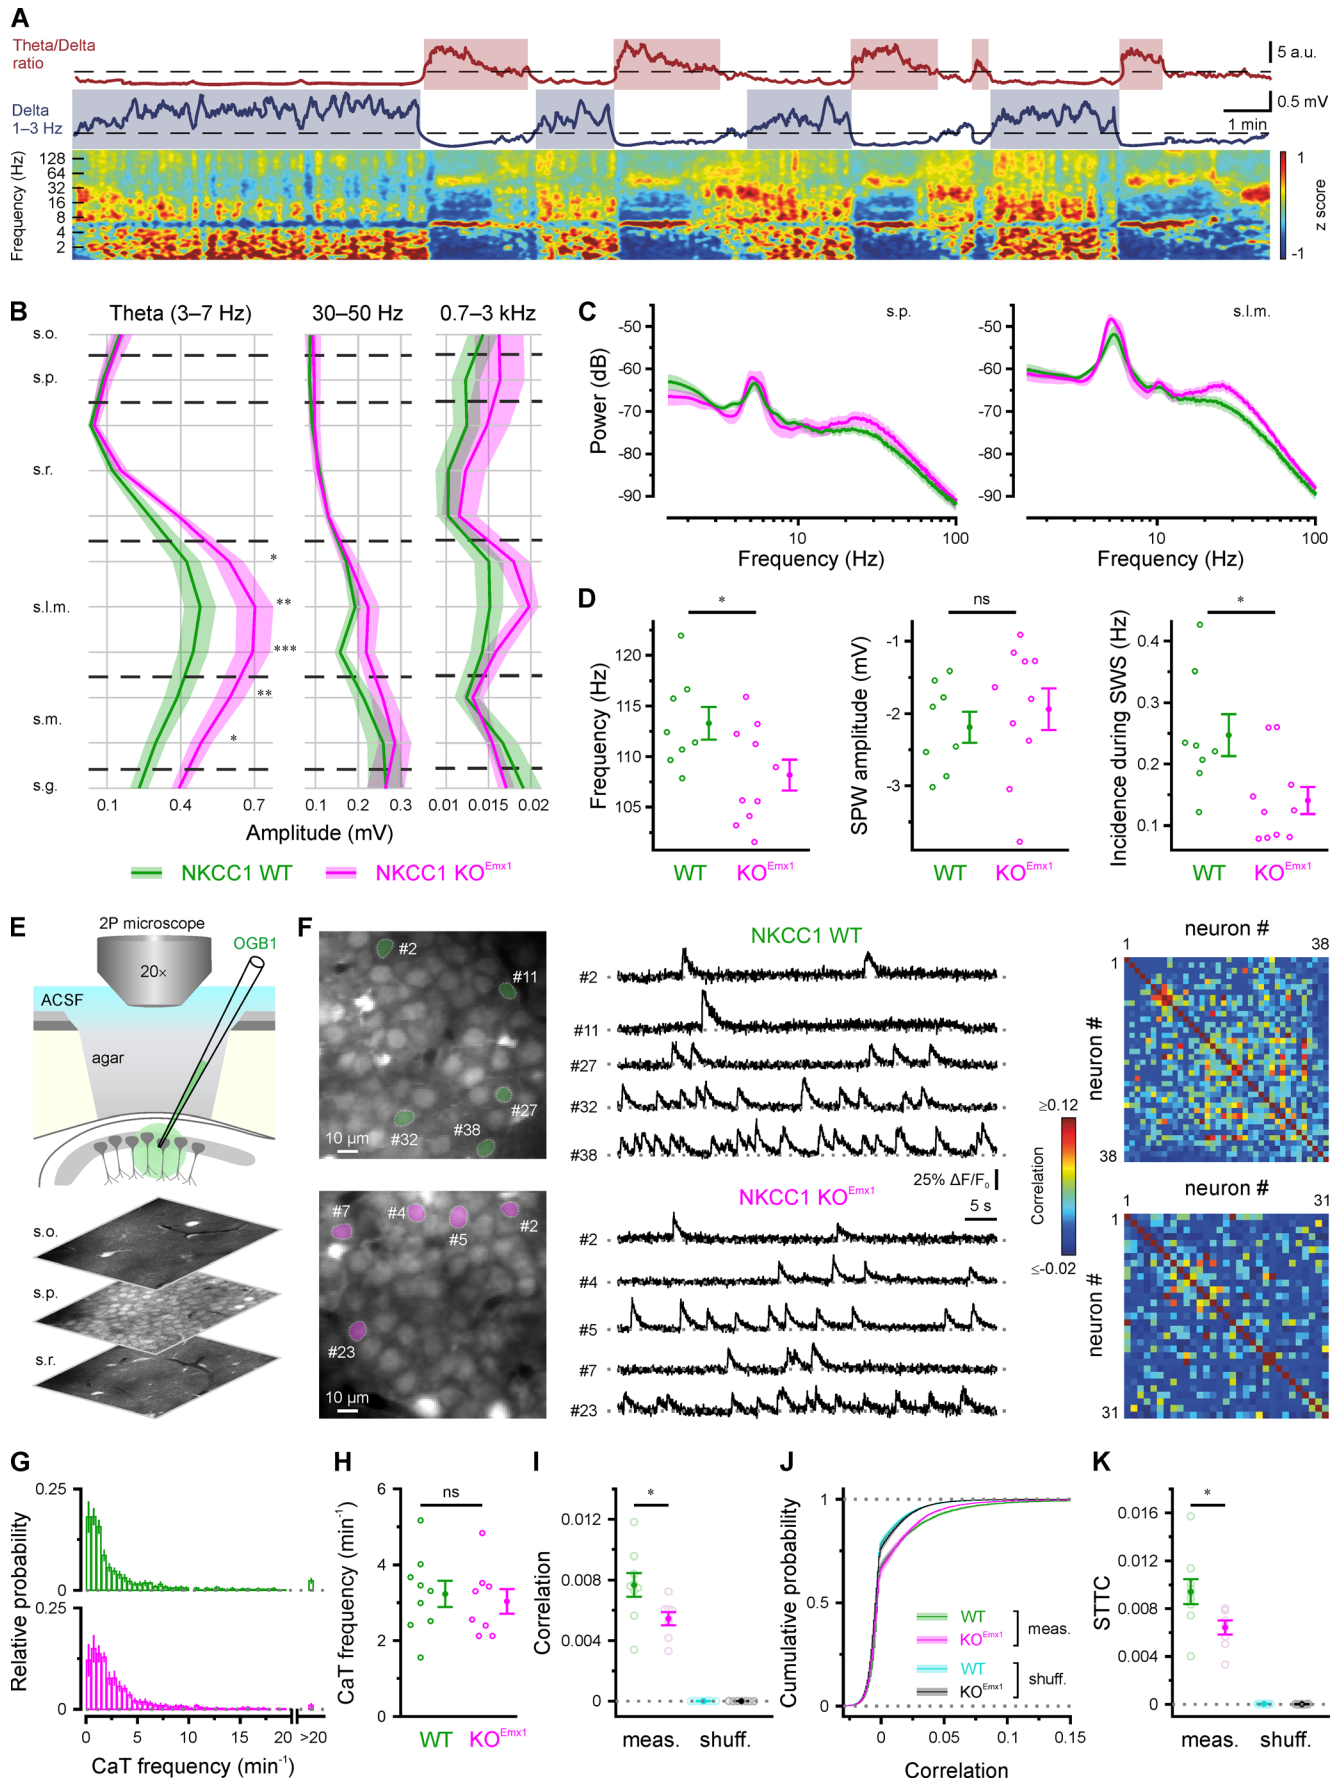

764 **Figure 7.** Long-term alterations of *in vivo* hippocampal network dynamics upon NKCC1  
765 deletion in *Emx1*-lineage cells. (A) *Top*: Representative example of REM- and slow wave  
766 sleep- (SWS) like activity classification of the hippocampal LFP in adult urethane-  
767 anesthetized mice. SWS- and REM-like activity in s.l.m. showed characteristic inverted peaks  
768 in the delta band (blue trace) and theta/delta ratio (red trace), respectively. *Bottom*: Z-score  
769 normalized wavelet spectrogram showing the differences in theta and delta power between  
770 REM- and SWS-like oscillations. (B) Band-limited power analysis of the different strata in the  
771 dorsal hippocampus during REM-like activity. Theta amplitude (left) in s.l.m. and s.m. was  
772 higher in KO<sup>Emx1</sup> compared to WT mice. Low-gamma (middle) and MUA (0.7–3 kHz, right)  
773 frequency bands were unaffected, as were the remaining frequency bands analyzed (see  
774 Methods). Shaded areas represent  $\pm$  SEM across animals. (C) Power spectra comparison  
775 between s.p. and s.l.m. (D) SPW-R events occurring during SWS-like activity showed lower  
776 spectral frequency (left) and incidence (right) in KO<sup>Emx1</sup> compared to WT mice. However,  
777 ripple-associated SPWs showed no significant amplitude difference between the genotypes  
778 (middle). (E) Experimental arrangement and sample OGB1 fluorescence images from s.o.,  
779 s.p. and s.r. (F) *Left*: two-photon fluorescence images (OGB1); *middle*: sample  $\Delta F/F_0$  traces;  
780 *right*: Pearson correlation matrices for all analyzed neurons obtained from fields of view  
781 shown on the left. (G) Distribution of CaT frequencies per cell (averaged across animals). (H)  
782 Mean CaT frequencies. (I) Mean pairwise Pearson correlation coefficients for measured data  
783 and randomly shuffled CaT trains. (J) Cumulative distributions of pairwise Pearson correlation  
784 coefficients. (K) Mean pairwise spike time tiling coefficients (STTC) for measured data and  
785 randomly shuffled CaT trains at identical mean frequencies. Each open circle represents a  
786 single animal. Data are presented as mean  $\pm$  SEM. ns – not significant, \*  $P < 0.05$ , \*\*  $P <$   
787  $0.01$ , \*\*\*  $P < 0.001$ . See also Figure S7 and Table S7.



788

## Methods

### 789 **Animals**

790 A detailed list of mouse strains used in this study is provided in Table S8. All animal  
791 procedures were performed with the approval of the local governments (Thüringer Landesamt  
792 für Verbraucherschutz, Bad Langensalza, Germany, and Landesamt für Natur-, Umwelt- und  
793 Verbraucherschutz, NRW, Recklinghausen, Germany) and complied with European Union  
794 norms (Directive 2010/63/EU). Animals were housed in standard cages with 14h/10h (Jena)  
795 or 12h/12h (Cologne) light/dark cycles. *Emx1*<sup>IREScre</sup> (stock no. 005628), *GCaMP3*<sup>LSL</sup> (Ai38,  
796 stock no. 014538), *tdTomato*<sup>LSL</sup> (Ai14, stock no. 007908) and C57BL/6J (stock no. 000664)  
797 mice were originally obtained from the Jackson Laboratory. *NKCC1*<sup>flox</sup> (*Slc12a2*<sup>flox</sup>) mice were  
798 generated as previously described (Antoine et al., 2013). The age of the animals is indicated  
799 in the Results section. Double transgenic animals were obtained by crossing  
800 *Emx1*<sup>IREScre/wt</sup>:*NKCC1*<sup>flox/flox</sup> female to *NKCC1*<sup>flox/flox</sup> male mice. Triple transgenic animals were  
801 obtained by crossing *NKCC1*<sup>flox/wt</sup>:*GCaMP3*<sup>LSL/LSL</sup> or *NKCC1*<sup>flox/wt</sup>:*tdTomato*<sup>LSL/LSL</sup> male to  
802 *Emx1*<sup>IREScre/IREScre</sup>:*NKCC1*<sup>flox/wt</sup> female mice. Animals having the genotype  
803 *Emx1*<sup>wt/wt</sup>:*NKCC1*<sup>flox/flox</sup>, *Emx1*<sup>IREScre/wt</sup>:*NKCC1*<sup>wt/wt</sup>:*GCaMP3*<sup>LSL/wt</sup> or  
804 *Emx1*<sup>IREScre/wt</sup>:*NKCC1*<sup>wt/wt</sup>:*tdTomato*<sup>LSL/wt</sup> are collectively referred to as WT, and animals with  
805 the genotype *Emx1*<sup>IREScre/wt</sup>:*NKCC1*<sup>flox/flox</sup>, *Emx1*<sup>IREScre/wt</sup>:*NKCC1*<sup>flox/flox</sup>:*GCaMP3*<sup>LSL/wt</sup> or  
806 *Emx1*<sup>IREScre/wt</sup>:*NKCC1*<sup>flox/flox</sup>:*tdTomato*<sup>LSL/wt</sup> are collectively referred to as KO<sup>Emx1</sup>. Mice of either  
807 sex were used. Experiments were performed blinded to genotype.

808

### 809 **Preparation of acute brain slices**

810 Animals were decapitated under deep isoflurane anesthesia. The brain was quickly removed  
811 and transferred into ice-cold saline containing (in mM): 125 NaCl, 4 KCl, 10 glucose, 1.25

812 NaH<sub>2</sub>PO<sub>4</sub>, 25 NaHCO<sub>3</sub>, 0.5 CaCl<sub>2</sub>, and 2.5 or 6.0 MgCl<sub>2</sub>, gassed with 5% CO<sub>2</sub> /95% O<sub>2</sub> (pH  
813 7.4). Horizontal or coronal brain slices (350 μm) were cut on a vibratome and stored for at  
814 least 1 h before their use at room temperature in artificial cerebrospinal fluid (ACSF)  
815 containing (in mM): 125 NaCl, 4 KCl, 10 glucose, 1.25 NaH<sub>2</sub>PO<sub>4</sub>, 25 NaHCO<sub>3</sub>, 2 CaCl<sub>2</sub>, and 1  
816 MgCl<sub>2</sub>, gassed with 5% CO<sub>2</sub> /95% O<sub>2</sub> (pH 7.4). For recordings, slices were placed into a  
817 submerged-type recording chamber on the microscope stage (Nikon Eclipse FN1, Nikon  
818 Instruments Inc.), which was equipped with near-infrared differential interference contrast  
819 video-microscopy (ACSF flow rate ~3–4 ml min<sup>-1</sup>). All experiments were performed at ~32 °C.

820

### 821 ***Patch-clamp recordings in vitro***

822 Electrophysiological signals were acquired using an Axopatch 200B or Multiclamp 700B  
823 amplifier, a 16-bit AD/DA board (Digidata 1440A or Digidata 1550A) and the software pClamp  
824 10 (Molecular Devices). Signals were low-pass filtered at 1–3 kHz and sampled at 10–20 kHz.  
825 To estimate E<sub>GABA</sub> non-invasively while minimizing the risk of unintended membrane  
826 breakthrough, GABA-induced membrane potential (V<sub>m</sub>) alterations were measured using low-  
827 concentration gramicidin perforated-patch current-clamp recordings (I = 0 mode of the  
828 amplifier) (Perkins, 2006; Zhang et al., 2019; Zhu et al., 2008). Recording pipettes (5–8 MΩ)  
829 were filled with the following solution (in mM): 140 K-gluconate, 1 CaCl<sub>2</sub>, 2 MgCl<sub>2</sub>, 11 EGTA,  
830 10 HEPES (pH 7.25), supplemented with 40–80 μg/ml gramicidin. Measured voltages were  
831 corrected for the calculated liquid junction potential (~16 mV). Recordings were performed in  
832 the presence of antagonists of ionotropic glutamate receptors (10 μM DNQX, 50 μM APV)  
833 and voltage-gated Na<sup>+</sup> (0.5 μM TTX) and Ca<sup>2+</sup> (100 μM CdCl<sub>2</sub>) channels so as to block  
834 amplification of voltage changes by intrinsic conductances. A saturating puff of the GABA<sub>A</sub>R  
835 agonist isoguvacine (100 μM, 2 s) was applied twice to the soma of the recorded cell at an

836 interval of 2 min. As demonstrated before,  $V_{\text{peak}}$  approximates  $E_{\text{GABA}}$  under these conditions  
837 (Zhu et al., 2008).

838 For measurements of spontaneous or agonist-induced action currents, tight-seal cell-attached  
839 recordings were performed in voltage-clamp mode using glass pipettes filled with the  
840 following solution (in mM): 150 NaCl, 4 KCl and 10 HEPES (pH 7.4). In addition, 50  $\mu\text{M}$  Alexa  
841 Fluor 555 was added to the pipette solution to detect potential membrane breakthrough.  
842 Holding current was manually zeroed before each experiment.

843 For recording sGPSCs, the intra-pipette solution contained (in mM): 150 Cs-  
844 methanesulfonate, 5 NaCl, 10 HEPES, 5 EGTA, 0.5  $\text{CaCl}_2$  (pH 7.3). Holding potential was set  
845 to 0 mV (compensated for the calculated liquid junction potential of  $\sim 10$  mV) to isolate  
846 sGPSCs from glutamatergic sEPSCs. sGPSCs were detected using template matching  
847 (pClamp 10).

848 GABA<sub>A</sub>R-mediated mGPSCs and AMPA receptor-mediated mEPSCs were recorded using  
849 the whole-cell patch-clamp technique. Intra-pipette solution contained (mM) (1) for mGPSCs:  
850 145 CsCl, 5 NaCl, 10 HEPES, 2 QX-314, 0.2 EGTA, 2 Mg-ATP, 0.3 Na-GTP (pH 7.3), or (2)  
851 for mEPSCs: 125 Cs-methanesulfonate, 20 CsCl, 5 NaCl, 10 HEPES, 2 QX-314, 0.2 EGTA, 2  
852 Mg-ATP, 0.3 Na-GTP (pH 7.3). Alexa Fluor 555 (50  $\mu\text{M}$ ) was regularly included for  
853 morphological identification of the recorded cell. Pipette resistance was 3–5  $\text{M}\Omega$  when filled  
854 with the solution mentioned above. Holding potential was set to  $-70$  mV (not corrected for  
855 liquid junction potentials). Access resistance was monitored by applying hyperpolarizing  
856 pulses of 10 mV. Only recordings with an access resistance below 30  $\text{M}\Omega$  were accepted.  
857 Series resistance compensation was not applied.

858 To measure passive properties and intrinsic excitability, whole-cell voltage-clamp and current-  
859 clamp recordings were used, respectively. Intra-pipette solution contained (in mM): 133 K-

860 gluconate, 12 KCl, 5 NaCl, 10 HEPES 10, 0.2 EGTA, 2 Mg-ATP, 0.3 Na-GTP (pH 7.3),  
861 regularly supplemented with Alexa Fluor 488 (10  $\mu$ M). Ionotropic glutamate and GABA  
862 receptor antagonists (10  $\mu$ M DNQX, 50  $\mu$ M APV, 10  $\mu$ M bicuculline methiodide [BMI]) were  
863 added to the ACSF to abolish recurrent excitation and to minimize synaptic noise. In voltage-  
864 clamp recordings, holding potential was set to  $-70$  mV; in current-clamp measurements,  
865 membrane potential was biased to  $-70$  mV before a series of 500-ms episodic current  
866 injections (from  $-120$  pA to 120 pA with 10 pA increments) was applied. Only recordings with  
867 an access resistance below 30 M $\Omega$  were accepted. Series resistance compensation was not  
868 applied.

869

### 870 ***Confocal Ca<sup>2+</sup> imaging in vitro***

871 Large-scale Ca<sup>2+</sup> imaging was performed in horizontal cortico-hippocampal slices from mice  
872 conditionally expressing the genetically encoded Ca<sup>2+</sup> indicator GCaMP3 in *Emx1*-positive  
873 cells. For single-cell Ca<sup>2+</sup> imaging, cells were loaded with the membrane-permeable Ca<sup>2+</sup>  
874 indicator Oregon Green 488 BAPTA-1 AM (OGB1) using multi-cell bolus-loading in s.p. of  
875 hippocampal CA1 or CA3, as indicated in the Results section. Fluorescence signals were  
876 acquired at  $\sim 22.5$  Hz using a CSU10 Nipkow-disc scanning unit (Yokogawa Electric Corp.) in  
877 combination with a Rolera XR FAST 1394 CCD camera (12 bit, QImaging Corp.) and the  
878 software Winfluor 3.7.5 (Dr. John Dempster, University of Strathclyde, Glasgow) or Streampix  
879 5 (NorPix). Excitation light at 488 nm was provided by a single wavelength solid-state laser  
880 (Sapphire CDRH-LP, Coherent) via a 2.5 $\times$ /0.075 (Zeiss) or 16 $\times$ /0.8 W (Nikon) objective for  
881 large-scale and single-cell imaging, respectively. An acousto-optic tunable filter (GH18A,  
882 Gooch & Housego) was used to adjust the final laser power of excitation.

883

884 ***Surgical preparation, anesthesia and animal monitoring for in vivo imaging***

885 Animals were placed onto a warm platform and deeply anesthetized with isoflurane (3.5% for  
886 induction, 1–2% for maintenance) in pure oxygen (flow rate: 1 l/min). The skin overlying the  
887 skull was disinfected and locally infiltrated with 2% lidocaine (s.c.). Eyes of adult mice were  
888 lubricated with a drop of eye ointment (Vitamycin) and covered with aluminum foil. Scalp and  
889 periosteum were removed, and a custom-made plastic chamber with a central borehole ( $\emptyset$   
890 2.5–4 mm) was fixed on the skull using cyanoacrylate glue (for CA1 recordings at P3–4: 3.5  
891 mm rostral from lambda and 1.5 mm lateral from midline; at P45–50: 2.5 mm caudal from  
892 bregma and 2.2 mm lateral from midline; for V1 recordings: 1.5–2.5 mm lateral from midline,  
893 immediately rostral to the transverse sinus).

894 For the hippocampal window preparation (Mizrahi et al., 2004), the plastic chamber was  
895 tightly connected to a preparation stage and subsequently perfused with ACSF containing (in  
896 mM): 125 NaCl, 4 KCl, 25 NaHCO<sub>3</sub>, 1.25 NaH<sub>2</sub>PO<sub>4</sub>, 2 CaCl<sub>2</sub>, 1 MgCl<sub>2</sub> and 10 glucose (pH 7.4,  
897 35–36°C). A circular hole was drilled into the skull using a tissue punch (outer diameter 1.8  
898 mm for P3–4 and 2.3 mm for P45–50 mice). The underlying cortical tissue and parts of corpus  
899 callosum were carefully removed by aspiration using a vacuum supply and a blunt 27G or  
900 30G needle. Care was taken not to damage alveus fibers. As soon as bleeding stopped, the  
901 animal was transferred to the microscope stage. For transcortical LFP recordings in CA1 (see  
902 Figure S5), a small craniotomy was performed above the somatosensory cortex (4 mm rostral  
903 from lambda and 1.5 mm lateral from midline) using a 30G needle.

904 For visual cortex measurements, the mouse was transferred to the microscope stage, and the  
905 plastic chamber perfused with ACSF (as above). At P9–10, a craniotomy was performed  
906 above the left occipital cortex using a 27G needle. Care was taken not to damage the  
907 underlying dura mater. At P3–4, measurements were performed through the intact skull.

908 During *in vivo* recordings, body temperature was continuously monitored and maintained at  
909 close to physiological values (34–37°C) by means of a heating pad and a temperature sensor  
910 placed below the animal. Spontaneous respiration was monitored using a differential pressure  
911 amplifier (Spirometer Pod and PowerLab 4/35, ADInstruments). For wide-field Ca<sup>2+</sup> imaging at  
912 P3–4 and P9–10, isoflurane was discontinued after completion of the surgical preparation and  
913 gradually substituted with the analgesic-sedative nitrous oxide (up to the fixed final N<sub>2</sub>O/O<sub>2</sub>  
914 ratio of 3:1, flow rate: 1 l/min). Experiments started 60–120 min after withdrawal of isoflurane.  
915 For two-photon Ca<sup>2+</sup> imaging experiments at P45–50, the isoflurane concentration was  
916 gradually reduced to 0.4–0.6%. At the end of each experiment, the animal was decapitated  
917 under deep isoflurane anesthesia.

918

### 919 ***In vivo wide-field Ca<sup>2+</sup> imaging and LFP recording***

920 The recording chamber was continuously perfused with ACSF (as above). In case of  
921 recordings in CA1, a tungsten microelectrode (Tunglass-1, 0.8 MΩ impedance, Kation  
922 Scientific) was lowered just above the hippocampal formation. ACSF was then removed and  
923 the hippocampal window was filled up with agar (1%, in 0.9 mM NaCl). As soon as the agar  
924 solidified, the chamber was reperfed with ACSF. Next, the microelectrode was slowly  
925 lowered to 200–250 μm below the hippocampal surface preparation. The final electrode depth  
926 was determined when the recorded SPWs showed a polarity reversal.

927 For transcortical LFP recordings in CA1 (Figure S5), a tungsten microelectrode was lowered  
928 to 1400–1600 μm below the skull. The final electrode depth was determined when recorded  
929 SPWs qualitatively showed a polarity reversal. In order to confirm the proper electrode  
930 position *post hoc*, an electrolytic lesion was performed via the electrode (4 V for 5 s, Master-8,  
931 A.M.P.I.) at the end of the experiment. Electrophysiological signals were acquired and low-

932 pass-filtered at 3 kHz using an EXT-02F/2 amplifier (npi electronic), a 16-bit AD/DA board  
933 (PowerLab 4/35, ADInstruments) and the software LabChart 8 (ADInstruments). Signals were  
934 and sampled at 20 kHz.

935 Wide-field epifluorescence  $\text{Ca}^{2+}$  imaging was performed in mice conditionally expressing  
936 GCaMP3 in *Emx1*-positive cells. One-photon excitation was provided by either a xenon arc  
937 lamp (Lambda LS, Sutter Instrument) coupled via a liquid light guide to the epifluorescence  
938 port of a Movable Objective Microscope (Sutter Instrument) for V1 recordings or a 470-nm  
939 collimated LED (Thorlabs) connected to a Zeiss Axioskop for hippocampal recordings and  
940 filtered at 472/30 nm (AHF Analysentechnik). Emission was separated from excitation light at  
941 495 nm and long-pass-filtered at 496 nm (AHF Analysentechnik). Images were acquired using  
942 a 10×/0.3 NA water immersion objective lens (Zeiss) and a 12-bit Rolera-XR camera  
943 (QImaging) operated by the software Streampix 5 (NorPix) or Winfluor 3.7.5 (Dr. John  
944 Dempster, University of Strathclyde, Glasgow). Using 4×4 hardware binning (174×130 pixels),  
945 the sampling rate was ~74.3 Hz. For V1 recordings the field of view was 1,134×867  $\mu\text{m}$  and  
946 for hippocampal recordings 877×696  $\mu\text{m}$ . Recording time per condition typically amounted to  
947 20–30 min.

948

#### 949 ***In vivo two-photon $\text{Ca}^{2+}$ imaging in adult mice***

950 The recording chamber was continuously perfused with ACSF (as above). Cells were loaded  
951 with the membrane-permeable  $\text{Ca}^{2+}$  indicator Oregon Green 488 BAPTA-1 AM (OGB1) using  
952 multi-cell bolus-loading in s.p. of hippocampal CA1 (Stosiek et al., 2003). ACSF was then  
953 removed and the hippocampal window was filled up with agar (1%, in 0.9 mM NaCl) and  
954 covered with a cover glass. As soon as the agar solidified, the chamber was reperfed with  
955 ACSF. To achieve de-esterification, recordings started ~60 min after OGB1 injection. Imaging

956 was performed using a Movable Objective Microscope (Sutter Instrument) equipped with two  
957 galvanometric scan mirrors (6210H, MicroMax 673XX Dual Axis Servo Driver, Cambridge  
958 Technology) and a piezo focusing unit (P-725.4CD PIFO, E-665.CR amplifier, Physik  
959 Instrumente) controlled by a custom-made software written in LabVIEW 2010 (National  
960 Instruments) (Kummer et al., 2015) and MPscope (Nguyen et al. 2006). Fluorescence  
961 excitation at 800 nm was provided by a tuneable Ti:Sapphire laser (Chameleon Ultra II,  
962 Coherent) using a 20×/1.0 NA water immersion objective (XLUMPLFLN 20XW, Olympus).  
963 Emission light was separated from excitation light using a 670-nm dichroic mirror (670  
964 DCXR, Chroma Technology), short-pass filtered at 680 nm and detected by a  
965 photomultiplier tube (12 bit, H10770PA-40, Hamamatsu). Data were acquired using two  
966 synchronized data acquisition devices (NI 6110, NI 6711, National Instruments). Sampling  
967 rate was set 31.4 Hz (110×110 pixels, 106×106 μm). For each animal, spontaneous activity  
968 was recorded within 3–5 fields of view, each one usually for ~20 min.

969

### 970 ***Acute in vivo silicon probe depth recordings of awake head-fixed neonatal mice***

971 *In vivo* depth recordings with linear 32-site silicon probes were performed in awake, head-  
972 fixed animals. For analgesia, animals received buprenorphine (0.025 mg/kg body weight  
973 subcutaneously [s.c.]) 30 min prior to anesthesia induction, which was done with 4%  
974 isoflurane in 100% oxygen in an induction chamber. Anesthesia was maintained using 1.0–  
975 2.0% isoflurane throughout the entire surgical procedure. Once sufficient depth of anesthesia  
976 was achieved, which was verified by observing the absence of tail pinch and pedal withdrawal  
977 reflexes, a midline skin incision was performed on the top of the skull. For additional  
978 analgesia, skin incisions were treated with the local anesthetic bupivacaine (Bucain®-Actavis  
979 0.25%). The periosteum was denatured by short (3–4 s) H<sub>2</sub>O<sub>2</sub> (10%) treatment and



980 subsequently removed with a cotton swab. The skull surface was rinsed with NaCl 0.9%  
981 solution and dried. For a common ground and reference electrode, a hole was drilled above  
982 the cerebellum. A silver wire was inserted above the dura of the cerebellum and fixed with  
983 dental cement. Subsequently, a metal tube was positioned over the cerebellar skull and  
984 attached with dental cement to facilitate fixation of the animal using the ear bars of the mouse  
985 stereotaxic apparatus (Stoelting). Mice were resting during the entire recording on a heated,  
986 custom-made padded brass block allowing unrestrained limb movements and, thereby,  
987 reducing movement artifacts in the recorded LFP. Constant ambient nest temperature of  
988 approximately 34°C was maintained on top of the brass block by use of a homeothermic  
989 heating pad (Stoelting), which was placed below the block and connected with a feedback  
990 sensor to the temperature controller. To insert silicon probes targeting the dorsal hippocampal  
991 CA1 or the primary visual (V1) cortex regions, burr holes were placed at the following  
992 stereotaxic coordinates: For dorsal CA1, rostral-caudal half of the lambda-bregma distance;  
993 dorso-ventral 1.9–2.3 mm, 1.2 mm lateral from the sagittal suture at P5, 1.4 mm at P7, and  
994 1.65 mm at P12. For V1 recordings of all ages, the electrode positions were 0.1–0.2 mm  
995 anterior of lambda, 2.4–2.8 mm lateral and 0.8 mm dorso-ventral. Isoflurane anesthesia was  
996 discontinued once surgery was complete. Linear 32-site (A1x32-5mm-50-703-A32;  
997 NeuroNexus) or 16-site (A1x16-3mm-50-703-A16; NeuroNexus) silicon probes with a  
998 distance of 50  $\mu\text{m}$  between the recording sites and a site surface of 703  $\mu\text{m}^2$ , were implanted  
999 perpendicular to the brain surface along the hippocampal CA1-DG axis or in V1, respectively.  
1000 The silicon probes were connected to a 1x preamplifier (Neuralynx) mounted to the  
1001 stereotaxic instrument (Stoelting). Data were digitally filtered (0.5–9000 Hz bandpass) and  
1002 digitized as 16-bit integers with a sampling rate of 32 kHz using a Digital Lynx 4S data  
1003 acquisition system (Neuralynx). Neuralynx files were pre-processed into open formats and

1004 downsampled for neonatal LFP analysis to 1280 Hz using NManager Plugins from  
1005 Neurosuite (neurosuite.sourceforge.net). For unit analyses, files were high-pass filtered with a  
1006 median filter (window size 39 samples), and common median referenced by subtracting the  
1007 median of six neighboring channels (excluding nearest neighbors) in Matlab. Spikes were  
1008 extracted for channels surrounding the CA1 s.p. by NManager Plugins and the first three  
1009 PCA components clustered by KlustaKwik2 (<https://github.com/kwikteam/klustakwik2>).  
1010 Artefacts and low-quality units were removed by hand using Klusters (Neurosuite) and the  
1011 resulting units merged into MUA for further analysis. Animal movements were detected by a  
1012 piezoelectric sensor placed under the animal's chest and recorded in parallel with the same  
1013 sampling rate. Data acquisition was started about 15–30 min after probe insertion when  
1014 recording conditions were stable. Probe positions were marked by the silicon probe tips  
1015 labeled with the fluorescent dye Dil (Life Technologies) and verified in DAPI-stained (DAPI  
1016 Fluoromount-GTM fluorescent; Southern Biotech) coronal slices, which, in combination with  
1017 the depth profile of the LFP, allowed the post-hoc layer identification.

1018

### 1019 ***In vivo hippocampal recordings in adult mice***

1020 Adult mice were initially anesthetized with 1.0–1.3 mg/g bodyweight urethane (Sigma, 10%  
1021 w/v, in NaCl 0.9%). As it takes for urethane about 30 min to guarantee sufficient anesthesia  
1022 after injection, mice were additionally anaesthetized with the inhalative anesthetic isoflurane  
1023 for the first 30 min of the procedure (1.0–1.5% in 100% oxygen). Animals were placed in a  
1024 stereotaxic apparatus where they remained head-fixed during the entire recording (Stoelting).  
1025 Body temperature was kept stable at 36.5°C during the operation and the recording using a  
1026 homeothermic heating pad (Stoelting). A midline skin incision was made on the top of the  
1027 skull. For a common ground and reference electrode, a hole was drilled above the cerebellum

1028 and a stainless steel screw, connected to the ground wire, was inserted ( $\lambda$  -1.5 mm, 1.0  
1029 mm lateral). For the hippocampal silicon probe, a 0.8-mm wide burr hole was placed at 2.0  
1030 mm posterior to bregma and 1.6 mm left to the midline. The surgical procedure lasted 25–30  
1031 min, and isoflurane anesthesia was stopped once the surgery was finished. A linear 32-site  
1032 silicon probe with a distance of 50  $\mu$ m between the recording sites (A1x32-5mm-50-177;  
1033 NeuroNexus Technologies) was vertically inserted into the dorsal hippocampus (2.1 mm  
1034 depth) along the CA1-DG-axis. Data acquisition, storage, and pre-processing for offline  
1035 analysis were done as above.

1036

### 1037 ***Behavioral experiments***

#### 1038 *Open field*

1039 Ten-week-old mice were placed in the middle of a white plastic box (50×50×50 cm), and  
1040 spontaneous activity was recorded for 10 min using a CCD camera. The periphery was  
1041 defined as the region outside of a 25×25 cm central square. The total distance covered and  
1042 the time spent in each area were analyzed with TSE VideoMot2 software (TSE Systems).

1043

#### 1044 *Morris water maze*

1045 Spatial learning and memory were assessed in a circular pool (diameter 120 cm, height 60  
1046 cm) filled with opaque water ( $23 \pm 1^\circ\text{C}$ ) to a depth of approximately 30 cm. In order to escape  
1047 from the water, mice had to locate a hidden platform (diameter 10 cm) placed approximately  
1048 0.5 cm below the water surface. A fixed array of extra-maze cues (e.g. geometric shapes,  
1049 cupboards) was available for spatial navigation. On the day before training, mice were given a  
1050 single 60-s trial in the pool without a platform to habituate them to the test situation. During  
1051 the next eight days, mice were tested for four trials each day in the hidden-platform task: Mice

1052 were individually released into the water at one out of four cardinal points, facing the pool  
1053 wall. The release points changed pseudo-randomly across trials and days but were the same  
1054 for all animals. If a mouse failed to locate the platform within 60 s, it was gently guided to it.  
1055 Mice were allowed to rest on the platform for 20 s and returned to a warm cage for an inter-  
1056 trial-interval of 30 s. 24 hours after the last training trial, a 60-s probe trial was implemented to  
1057 assess spatial reference memory. To this end, the platform was removed from the pool, and  
1058 mice started from the quadrant opposite to the former platform position. 24 hours after the  
1059 second probe trial, a cued test (four 60-s trials) was carried out to control for non-mnemonic  
1060 factors (e.g. visual or motor disturbances, motivation) that may influence task performance.  
1061 Here, the platform was visible (raised 0.5 cm above the water surface and marked with a flag)  
1062 and moved to a new position each trial. All trials were recorded by an automated video  
1063 tracking system (TSE VideoMot2, TSE) to determine the path length (distance) during training  
1064 and cued trials, and the percent time spent in each quadrant in the probe trials.

1065

### 1066 *Fear conditioning*

1067 The apparatus (UgoBasile) consisted of four sound-attenuating cubicles, each containing an  
1068 inner chamber that could be made distinct between trials by changing its shape, wall patterns,  
1069 floor, illumination and ventilation. Mouse behaviour was monitored by a USB video camera  
1070 connected to a PC running ANY-maze software (Stoelting). During acquisition, mice were  
1071 placed into a transparent cuboid conditioning chamber with a shock grid floor that had 5 lx  
1072 illumination, fan speed set at 100% and was cleaned with 70% ethanol. After 3 min, a tone  
1073 was presented (conditioned stimulus (CS); 20 s, 80 dB, 9000 Hz) that co-terminated with an  
1074 electric foot shock (unconditioned stimulus (US); 2 s, 0.7 mA). 60 s later, animals were  
1075 returned to their home cages. To evaluate auditory-cued fear memory, mice were placed into

1076 a novel context (plexiglass cylinder, walls covered by a vertical pattern of black and white  
1077 stripes, solid white plastic floor, cleaned with 5 % acetic acid, fan speed 50 %) and the house  
1078 light was switched on (2 lx). Three minutes later, mice were re-exposed to the tone for 3 min,  
1079 followed by another 60 s before they were returned to their home cage. Contextual fear was  
1080 tested on the same day by re-exposing mice to the original conditioning context for 3 min.  
1081 Freezing behaviour was analyzed offline from the video recordings.

1082

### 1083 *Y maze*

1084 The apparatus consisted of three white, opaque plastic arms (40×6.5×10 cm) interconnected  
1085 at an angle of 120°. A separate cohort of mice was used. Mice were placed into the center of  
1086 the maze and allowed to freely explore until they completed 27 transitions. Entering an arm  
1087 with all four paws was considered as transition. Movements were recorded by an automated  
1088 video tracking system (TSE VideoMot2, TSE). The sequence of arm entries was analyzed,  
1089 and triads (consecutive entries into three different arms) were counted to calculate the  
1090 percentage of spontaneous alternations, defined as the ratio of the actual-to-possible  
1091 completed triads:  $\text{alternations (\%)} = \frac{\text{[(number of completed triads)]}{\text{[(total number of arm entries - 2)]}} \times 100$ .  
1092

1093

### 1094 *Neonatal reflexes*

1095 Sensorimotor reflex development was assessed using the righting reflex and cliff avoidance  
1096 tests. Mice were tested at postnatal days 4, 7 and 12, and scored twice with an intertrial  
1097 interval of 30 sec and maximum trial duration of 30 sec. The righting reflex was assessed by  
1098 placing mice on their back and measuring the time needed for righting themselves. Righting  
1099 was considered successful when mice touched the ground with all four paws. Cliff avoidance

1100 reaction was measured by placing mice with their nose above the edge of the table. The time  
1101 needed to turn the body 90° relative to the edge of the table was recorded.

1102

### 1103 **Immunohistochemistry**

1104 *Emx1*<sup>IRESc<sup>re</sup>/wt</sup>·*NKCC1*<sup>wt/wt</sup>·*tdTomato*<sup>LSL/wt</sup> (n = 3) and *Emx1*<sup>IRESc<sup>re</sup>/wt</sup>·*NKCC1*<sup>flox/flox</sup>·*tdTomato*<sup>LSL/wt</sup>

1105 (n = 3) mice (P54–63) were deeply anaesthetized with isoflurane and transcardially perfused  
1106 with 4% paraformaldehyde (PFA) in phosphate-buffered saline (PBS). Brains were post-fixed  
1107 in 4% PFA overnight and sequentially cryoprotected in PBS containing 10% and 30%  
1108 sucrose, respectively. Coronal sections (40 µm) were prepared on a cyromicrotome (HM400,  
1109 Microm). For immunohistochemistry, slices were washed in PBS, permeabilized with 0.2%  
1110 Triton X-100 and blocked with 3% normal donkey serum (NDS). For primary antibodies raised  
1111 in mice, unspecific binding was minimized by pre-incubation with Fab fragments (donkey anti-  
1112 mouse) for 2h. Free-floating sections were incubated overnight with primary antibodies in  
1113 PBS containing 3% NDS/0.2% Triton X-100 at 4 °C. Following rinsing, secondary antibodies  
1114 were applied for 3 h at room temperature in PBS supplemented with 3% NDS/0.2% Triton X-  
1115 100. Slices were rinsed again and mounted on slides using Fluoromount (SouthernBiotech). A  
1116 detailed list of antibodies used in this study is provided in Table S8. DAPI was applied to  
1117 counterstain nuclei. Fluorescence images (z-stacks with 1-µm vertical separation of optical  
1118 sections) were acquired with an LSM 710 laser-scanning confocal microscope and a 40× oil  
1119 immersion objective (Zeiss).

1120

### 1121 **Quantitative PCR**

1122 Mice (P2–3) were decapitated under deep isoflurane anesthesia. Brains were quickly  
1123 removed and transferred to an ice-cold preparation platform under a stereomicroscope. From

1124 each animal, either the hippocampi or the left visual cortex were manually dissected, frozen  
1125 and stored at  $-80^{\circ}\text{C}$ . Total RNA was isolated by the phenol chloroform extraction method and  
1126 reverse transcribed into cDNA by the use of the RevertAid First Strand cDNA Synthesis Kit  
1127 (ThermoFisher). The qPCR was performed as previously described (Frahm et al., 2017) using  
1128 specific primers for *Slc12a2* (forward [fw] primer: TCAGCCATACCCAAAGGAAC; reverse [rv]  
1129 primer: AACACACGAACCCACAGACA). For normalization, *Gapdh* (fw primer:  
1130 CAACAGCAACTCCCCTCTTC; rv primer: GGTCCAGGGTTTCTTACTCCTT) and *Hmbs* (fw  
1131 primer: GTTGGAATCACTGCCCGTAA; rv primer: GGATGTTCTTGGCTCCTTTG) were used  
1132 as reference genes.

1133

### 1134 **Chemicals**

1135 A detailed list of chemicals used in this study is provided in Table S8.

1136

### 1137 **Analysis and quantification**

#### 1138 *Electrophysiological recordings in vitro*

1139 To quantify the irregularity of sGPSCs, a (frequency-dependent) metric referred to as burst  
1140 index was defined as the fraction of inter-sGPSC intervals  $\leq 50$  ms. Only cells with  $\geq 50$   
1141 detected sGPSCs were included in the analysis. Burst indices computed for measured data  
1142 were compared to burst indices reflecting a Poisson point process in which sGPSCs occur  
1143 randomly. In such a case, inter-event intervals are exponentially distributed, and the  
1144 probability of an event within a time  $t$  is given by:

$$P(T \leq t) = 1 - e^{-\lambda t}$$

1145 where  $\lambda$  is the mean event rate (in Hz) and  $t = 0.05$  s.

1146 In current-clamp recordings, action-potential threshold was determined as the  $V_m$  value at

1147 which the first time derivative of  $V_m$  exceeded 10 V/s (Stimfit). mGPSCs and mEPSCs were  
1148 analyzed using Minianalysis 6.0.

1149

### 1150 *Confocal Ca<sup>2+</sup> imaging in vitro*

1151 To correct for x-y drifts during measurements, image stacks were registered using a template-  
1152 matching algorithm (ImageJ plugin by Q. Tseng). Fluorescence signals were obtained from  
1153 manually selected regions of interest and expressed as relative changes from resting  
1154 fluorescence levels ( $\Delta F/F_0$ ). For large-scale imaging, onsets and offsets of CaTs were  
1155 manually determined using a threshold criterion, considering changes in  $\Delta F/F_0$  as an event if  
1156 they exceeded two times the standard deviation of the baseline for at least 200 ms. The area  
1157 under the curve of CaTs was computed for all regions and slices in which at least five events  
1158 were detected. For single-cell imaging, Ca<sup>2+</sup> transients (CaTs) were detected using a  
1159 template-matching algorithm implemented in pClamp 10 (Molecular Devices), and their times  
1160 of peak were defined as the times of CaT occurrence. Network events were operationally  
1161 defined as GDPs as follows: (1) CaTs were classified as GDP-related if they fell into a 500-  
1162 ms-long time interval during which the fraction of active cells was  $\geq 20\%$ . (2) Neighboring  
1163 GDP-related CaTs were assigned to the same GDP if both shared a 500-ms-long time  
1164 interval during which the fraction of active cells was  $\geq 20\%$ , otherwise to separate GDPs. For  
1165 each GDP, active cells were ranked according to their CaT times, and GDP half-width was  
1166 calculated as the difference in CaT times corresponding to the 25<sup>th</sup> and 75<sup>th</sup> percentiles of  
1167 active cells. Slices with less than 10 GDPs were excluded from analysis.

1168

### 1169 *In vivo widefield Ca<sup>2+</sup> imaging and LFP recording*

1170 For analysis, periods of movement artefacts were identified by visual inspection of raw image



1171 sequences and discarded because they frequently resulted in obviously false-positive  
1172 detection results. Image sequences were then binned (10×10), resulting in a regular grid of  
1173 17×13 = 221 ROIs (ROI dimensions: for V1: 66.7×66.7 μm, for hippocampus: 51.6×51.6 μm).  
1174 For CA1 data, we excluded those ROIs from further analysis that overlapped with the  
1175 extracellular microelectrode or minor blood residues. Next, light intensity-versus-time plots  
1176 were extracted using ImageJ. Unbiased peak detection of spontaneous CaTs was performed  
1177 using a template-matching algorithm implemented in pClamp 10. ‘Clusters’ of CaTs were  
1178 defined on a temporal basis. (I) For CA1: If two neighboring CaTs were separated by less  
1179 than 300 ms, they were considered to belong to the same cluster, otherwise to two separate  
1180 clusters. Only clusters with a fraction of active ROIs ≥10% of all analyzed ROIs were  
1181 considered. (II) For the visual cortex: If two neighboring CaTs were separated by less ≤10  
1182 frames (~135 ms), they were considered to belong to the same cluster, otherwise to two  
1183 separate clusters. The mean frequencies of CaTs per ROI and the mean cluster frequencies  
1184 were calculated as the ratio of number of events per corrected recording time (i.e., total  
1185 recording time minus cumulative movement artefact-associated recording time). Amplitudes  
1186 of CaTs were calculated as relative changes from resting fluorescence levels, defined for  
1187 each individual event. Maximum rise slopes were extracted from the first derivative of raw  
1188 fluorescence traces following Savitzky–Golay smoothing (2<sup>nd</sup> order, 8 sampling intervals), and  
1189 normalized to F<sub>0</sub>. Amplitudes and rise slopes were averaged for each Ca<sup>2+</sup> cluster. The  
1190 cluster area was calculated as the ratio of the number of active ROIs *versus* the total numbers  
1191 of ROIs analyzed. For hippocampal recordings, SPWs were detected as follows: Raw data  
1192 (20 kHz) were first down-sampled by a factor of four and filtered at 0.5–100 Hz (pClamp 10).  
1193 Candidate events were detected using a threshold algorithm. Visual inspection of high-pass  
1194 filtered (>100 Hz) signals was used to exclude false-positive events. Detected SPWs were

1195 separated into two either (I) movement-associated or (II) non-movement-associated SPWs  
1196 based on the respiration/movement signal from a pressure sensor placed below the mouse. A  
1197  $\text{Ca}^{2+}$  cluster was assigned to a SPW if the first cluster-related CaT was within the interval  
1198 [SPW time – 100 ms, SPW time + 400 ms].

1199

#### 1200 *In vivo two-photon $\text{Ca}^{2+}$ fluorescence imaging*

1201 Somatic fluorescence signals were obtained from manually selected regions of interest and  
1202 expressed as relative changes from resting fluorescence levels ( $\Delta F/F_0$ ). CaTs were detected  
1203 using UFARSA, an acronym for *Ultra-Fast Accurate Reconstruction of Spiking Activity*  
1204 (Rahmati et al., 2018). Reconstructed CaT times were translated into a binary vector for each  
1205 trace. Pairwise Pearson correlation coefficients were determined for all possible cell pairs  
1206 analyzed in a given image sequence using custom routines (Matlab, MathWorks). To this end,  
1207 binary CaT vectors were first convolved with a Gaussian kernel with a standard deviation of  
1208 two sampling intervals. Spike-time tiling coefficients (STTCs) were computed for all possible  
1209 cell pairs with a synchronicity window of three sampling intervals (~96 ms) using custom  
1210 routines (Matlab, MathWorks) (Cutts et al., 2014). Pearson correlation coefficients and STTCs  
1211 derived from measured data were compared to those from simulated data obtained by  
1212 randomly shuffling (uniform distribution; 4,000 times) CaT times of all cells. When performing  
1213 this randomization, the mean CaT frequency of each cell was kept unchanged.

1214

#### 1215 *Acute in vivo hippocampal & V1 depth recordings of unanesthetized neonatal mice*

1216 Analyses were performed using custom-written functions and scripts (Matlab, MathWorks).  
1217 The CA1 s.p. was identified as the channel with minimum coherence to nearest neighbors in  
1218 the frequency range of 8–64 Hz and confirmed to be the LFP reversal, corrected if necessary,

1219 using Neuroscope (Neurosuite). Current source density was computed as the second spatial  
1220 derivate of the 1–200 Hz forward and reverse 2-pole Butterworth-filtered LFP. Hippocampal  
1221 HNOs and V1 spindle bursts were marked using 10–30 Hz (HNOs) or 5–25 Hz (V1 spindle  
1222 bursts) power increases in the multitaper spectrogram (Chronux) of the whitened LFP by  
1223 three blinded individual observers who corrected each other's results. SPWs in neonates lack  
1224 ripples, and were detected on the median-filtered 10 Hz high-passed CSD and LFP using a  
1225 novel algorithm. Briefly, peaks in the inverted CSD with half-width between 4–50 ms  
1226 exceeding the 99<sup>th</sup> percentile CSD negativity in prominence, and no closer than 12 ms apart,  
1227 are detected using Matlab findpeaks() for each channel. Solitary peaks without a neighboring  
1228 ( $\pm 2$  channels) CSD peak in a  $\pm 14$  ms window, or smaller than -0.1 mV in a  $\pm 3$  ms window of  
1229 the LFP, are then discarded. Finally, the largest peak in each 7 ms window is kept, and any  
1230 putative SPW following another by less than 40 ms (typically, the rebound sink in s.o. for  
1231 strong radiatum / lacunosum SPWs) is merged with the previous SPW. SPWs with the most  
1232 negative CSD sink above and including the reversal layer are considered 'oriens' SPWs,  
1233 those below as 'rad/lm' (radiatum / lacunosum). For statistics, amplitude was taken from the  
1234 most negative LFP channel in a window  $\pm 3$  ms around the CSD-derived SPW trough. HNO  
1235 spectrograms displayed were computed using Morse wavelets with a time-bandwidth product  
1236 of 30, normalized to median absolute deviation (MAD) units per frequency bin, and then  
1237 smoothed with a 15 ms wide Hamming window. MUA was smoothed with a 7 ms Hanning  
1238 window for display.

1239

#### 1240 *Acute in vivo dorsal hippocampal depth recordings of urethane-anesthetized mice*

1241 All analyses of hippocampal LFP were made using custom-written Matlab scripts. REM- and  
1242 SWS-like activity in recordings of urethane-anesthetized mice were classified by thresholding

1243 the delta band (1–3 Hz) and theta (3–7 Hz)/delta ratio. The threshold was manually set for  
1244 each recording. Delta and theta bands were computed as the absolute value of the Hilbert  
1245 transform of the bandpass filtered LFP and smoothed with a 10-sec quadratic kernel.  
1246 Although we used a low dose of urethane (1.0–1.3 mg/g) in these experiments, we observed  
1247 a high variability in several electrophysiological markers, such as theta phase shifts, theta  
1248 power and cross frequency coupling, between the REM-like periods within a recording  
1249 session. Urethane is known to disrupt theta rhythm generation in the entorhinal cortex by  
1250 blocking local NMDA receptors (Gu et al., 2017). In order to reduce this variability, we  
1251 calculated the theta phase shift (Figure S7A) between s.p. and s.l.m for each REM-like period  
1252 and concentrated subsequent analyses on those periods showing shift values within the  
1253 highest quartile across a recording session. The resulting phase shift values were closer to  
1254 those observed in awake condition (Figure S7B) (Lubenov et al., 2009). Band-limited power  
1255 (BLP) analysis of the different strata in the dorsal hippocampus was performed for the  
1256 following frequency bands: delta, 1–3 Hz; theta, 3–7 Hz; sigma, 7–16 Hz; beta, 16–30 Hz,  
1257 low-gamma, 30–50 Hz; mid-gamma, 40–70 Hz; high-gamma, 70–100 Hz; high frequency  
1258 oscillation (HFO) 1, 110–170 Hz; HFO2, 140–240 Hz; HFO3, 300–600 Hz and MUA, 700–  
1259 3000 Hz. First, the original LFP at 32 kHz was downsampled to 1280 Hz (except for the MUA  
1260 band). Then this downsampled signal was bandpass filtered, rectified and resampled to 250  
1261 Hz. Hippocampal strata identification was assessed based on stereotaxic and  
1262 electrophysiological markers such as the laminar distribution of the aforementioned BLPs  
1263 during REM- and SWS-like activity, theta-gamma coupling as quantified by the modulation  
1264 index (MI) (Tort et al., 2008), ripple amplitude, theta phase shifts (Lubenov et al., 2009) and  
1265 spiking activity. All recordings were post-hoc histologically verified. Ripples were detected by  
1266 bandpass filtering the CA1 s.p. recording site at 90–180 Hz and thresholding at 4 SD of the

1267 absolute value of the Hilbert transform. Following detection, the frequency and duration of  
1268 individual ripple events were calculated from time-resolved generalized Morse wavelets  
1269 spectrograms of  $\pm 30$  ms peri-threshold crossing windows. For the MI laminar distribution and  
1270 comodulogram analyses, we selected the recording site with highest theta amplitude (s.l.m.)  
1271 as reference to extract the theta phases. The tested amplitude-modulated frequency bands  
1272 were low-, mid-, high-gamma and HFO.

1273

### 1274 **Statistical analysis**

1275 Statistical analyses were performed using OriginPro 2018, SPSS Statistics 22/24, Statistica  
1276 13.3, and Microsoft Excel 2010. Unless otherwise stated, the statistical parameter n refers to  
1277 the number of (I) animals for *in vivo* experiments, (II) slices for *in vitro*  $\text{Ca}^{2+}$  imaging and (III)  
1278 cells in patch-clamp recordings, respectively. All data are reported as mean  $\pm$  standard error  
1279 of the mean (SEM), if not stated otherwise. The Kolmogorov–Smirnov test or Shapiro–Wilk  
1280 test was used to test for normality of the data. Parametric testing procedures were applied for  
1281 normally distributed data; otherwise non-parametric tests were used. In the case of two-  
1282 sample t-tests and unequal group variances, Welch’s correction was applied. For multi-group  
1283 comparisons, analysis of variance (ANOVA) was applied. Analysis of covariance (ANCOVA)  
1284 was used to control for covariate effects. P values (two-tailed tests)  $< 0.05$  were considered  
1285 statistically significant. Details of the statistical tests applied are provided in Tables S1–S7.

1286

### 1287 **Data and code availability**

1288 All datasets generated during this study are available from the corresponding author upon  
1289 request.
